# Supplementary material
Source: publisher site journal article supplement (https://www.dovepress.com/get_supplementary_file.php?f=415974.docx)
Supplement: Supplementary file 1 [file get_supplementary_file.php]

| **Supplementary Table 1.** | | | |
| --- | --- | --- | --- |
| **Total known therapeutic targets of vitamin C** | | | |
| Slc23A2 | Cpe | Nox | Itgav |
| Slc23A1 | Prkacb | Ppara | Gprc5A |
| Gc | Pam | Chrm2 | Sirt5 |
| S100G | Pf4 | Abcc11 | Htr2A |
| Sec14L2 | Gucy2C | Mmp9 | Slco1B1 |
| Cyp3A4 | Fos | Cyp2A6 | Eno1 |
| Ttpal | Clec4E | Ca2 | Mark3 |
| Cyp27A1 | Pkc | Ret | Mmp2 |
| Afm | Cox5B | Abcc8 | Fgfr1 |
| Vkorc1L1 | Sh2B3 | Abcc9 | Egln2 |
| Cyp2R1 | Prkaca | Mapk8Ip1 | Pik3Ca |
| Ggcx | Pgr | Kcnc3 | Cr2 |
| Fdxr | Prep | Rps6Ka4 | Egln1 |
| Bal | Atp6V1C1 | Mocos | S100A12 |
| Tc2 | Cpa1 | Ern1 | Rpe65 |
| Mmachc | Mt-Co1 | Fgfr4 | Flt4 |
| Cyp3A | Kyat1 | Ctdsp1 | Ntrk2 |
| Pdxk | Thbd | Abca3 | Hm13 |
| Pros | Pkn1 | Fyn | Cdk1 |
| Cblif | Smpd3 | Gatb | Map4K2 |
| Nqo2 | Cpn1 | Akt1 | Eif6 |
| Vdr | Htr3C | Met | Kdr |
| Tcn1 | Dgka | Dgkz | Egln3 |
| Chrm5 | Abcc1 | Mrc1 | Csnk2A2 |
| Casr | Pkn2 | Egfr | Cdk2 |
| Ednra | Mertk | Clec3B | Acvr1B |
| Sptlc2 | Ywhab | Bcl2 | Pdgfra |
| Hint1 | Ganc | H2Bc4 | Flt1 |
| Cox7A1 | Cox17 | Kcnc1 | Csnk2A1 |
| Amn | Prkcq | Kcnc2 | Gper1 |
| Mtr | Ighm | Krt1 | Plk1 |
| Hspg2 | Npr2 | Myc | Pdpk1 |
| Sptlc3 | F5 | Prkd1 | Rela |
| Top2B | Prkcb | Taok2 | Btk |
| Ugt1A10 | C1Qc | Apoh | Chek1 |
| Cox6C | Prkci | Csf1R | Clu |
| Cox7B | Bcat1 | Ugt1A3 | Oprm1 |
| Cox8A | Ltc4S | Erbb3 | Htr2 |
| Cox6A2 | Ppbp | Asgr2 | Eif2Ak4 |
| Cox6B1 | Pparg | Serpina5 | Ca |
| Nqo1 | Mylk3 | Fgfr3 | Eif2Ak2 |
| Calb1 | Lrat | Mapt | S100A8 |
| Proc | Brd8 | Jun | Sfpq |
| F10 | Aass | Nme2 | S100A9 |
| Chrm1 | Kit | Erbb4 | Gsk3B |
| Sptlc1 | Fes | Ctsa | Prkca |
| Mt-Co2 | Ndufa4L2 | Gfer | Ptpn1 |
| Cox4I1 | Yes1 | Gpc1 | Ptpn2 |
| Mt-Co3 | Csk | Cftr | Cdc25B |
| Cox7C | Mt-Cyb | Itgax | Acp1 |
| Top2 | Ar | Lrp10 | Pdcd4 |
| Ccr4 | Serpine1 | Rcl1 | Ttl |
| Rfk | Msmo1 | Ppard | Dusp3 |
| Procr | Aplp1 | Grm3 | Iars |
| Mr1 | Trdmt1 | Baat | Gstm1 |
| F9 | Apobec1 | Ffar1 | Folh1 |
| Mtrr | Serpinb3 | Tfr | Pde4D |
| Cubn | Kyat3 | Casp9 | Tert |
| Cycs | Ldhc | Abl1 | Rps6Ka5 |
| Ccr5 | Mthfd1 | Serpina4 | Kdm3A |
| Ccl2 | Prkcd | Glrx2 | Kdm6B |
| Ccl8 | Prkce | Matk | Kdm5C |
| Ppp2Ca | Gabrr1 | Abcc4 | Atp2A1 |
| Npr3 | Raf1 | Abcc6 | Prkcg |
| Cxcr4 | F2 | Cmoat1 | Vav1 |
| Lyz | Nr3C1 | Fgr | Prkch |
| Cox5A | Sts | Erbb2 | Trpv4 |
| Cxcl10 | Mpl | Map3K9 | Ggh |
| Apoc3 | Stra6 | Dclk2 | Ptgs2 |
| Tnnc1 | Rbl2 | Mapk8 | Ca4 |
| Gpd1 | Src | Cmoat2 | Kcna3 |
| Cpb2 | Abcc10 | Sdhc | Stat3 |
| Aurkc | Cyp1A1 | Prkdc | F2Rl1 |
| Ros1 | Cxcl12 | Muc1 | Abcb1 |
| Rhcg | Nd | Tfrc | Atp6Ap1 |
| Thrb | Scarb1 | Ppif | Rorc |
| Hsd17B7 | Mark1 | Mapk9 | Atp1A1 |
| Tgm2 | Ntrk3 | Prkab1 | Ca9 |
| Fcgr2C | Hcrtr1 | Ttll3 | Ca1 |
| Lias | Nr3C2 | Nolc1 | Ptgs1 |
| Abcc5 | Thra | Fer | Gabra1 |
| Retsat | Ighg1 | Ltf | Lph |
| Cxcr1 | Ighg4 | Lck | Hl |
| Tnnc2 | Igha1 | Pdgfrb | Glur2 |
| Nsdhl | Rack1 | Mapk10 |  |

**Supplementary Table 2-1.**

| **Known therapeutic targets collected from OMIM** | | | |
| --- | --- | --- | --- |
| F3 | F12 | HAE3 | PAR3 |
| F5 | F13A1 | THPH8 | CF2R |
| F13B | F2 | HEMA | GPR11 |
| MCFD2 | VWF | TFA | HAF |
| GGCX | F7 | THPH2 | F13A |
| PROC | F10 | RPRGL1 | THPH1 |
| TFPI | F2RL3 | F5F8D2 | F8VWF |
| F11 | F9 | VKCFD1 | THPH4 |
| F2RL2 | F8 | PC | RPRGL2 |
| F2R | PAR1 | LACI | PAR4 |
| F2RL1 | PAR2 | THPH3 | HEMB |
| F8C |  |  |  |

**Supplementary Table 2-2.**

| **Known therapeutic targets collected from Drugbank** | | | |
| --- | --- | --- | --- |
| VEGFA | FGFR4 | FGFR2 | FOS |
| TFPI | FGF4 | FGF2 | MYC |
| HPSE | FGF19 | PF4 | ADAMTS4 |
| SERPINC1 | FGFR1 | HGF | ITGA4 |
| SELP | FGF1 | SERPINA7 | CXCL12 |
| F10 |  |  |  |

**Supplementary Table 2-3.**

| **Known therapeutic targets collected from GeneCards** | | | |
| --- | --- | --- | --- |
| F2 | GP1BA | LYST | APOE |
| F8 | PPBP | DPM2 | FLNA |
| F9 | CRP | PGM1 | ITGAM |
| F7 | CFI | DDOST | RYR1 |
| F5 | SERPIND1 | ACE | CFHR2 |
| F3 | F2RL2 | PPIC | INS |
| F10 | ELANE | SRD5A3 | SULT1A3 |
| VWF | CFH | HP | NBEAL2 |
| SERPINC1 | HRG | B4GALT1 | DOLK |
| F11 | ADAMTS13 | MPO | PRTN3 |
| F12 | ANXA5 | C1S | ALG8 |
| GGCX | PROZ | F8A1 | CTLA4 |
| FGA | ITGA2B | C3 | ALG13 |
| F13A1 | F2RL3 | SERPING1 | CD34 |
| THBD | VEGFA | DPM1 | IL2 |
| SERPINE1 | TNXA | IFNG | CALR |
| PROC | SERPINA5 | SERPINA3 | MAP2K1 |
| TFPI | CD40LG | IL4 | ALG12 |
| MCFD2 | IL10 | LRP1 | F7R |
| PLAT | PMM2 | COCH | MPI |
| LMAN1 | GPT | COG4 | CYP4F2 |
| F2R | ANO6 | PTPN11 | SLC17A5 |
| F13B | GP6 | C4B | RFT1 |
| PROS1 | JAK2 | SERPINB2 | SOS2 |
| FGB | IL1B | TAT | APOA1 |
| PROCR | FN1 | HPSE | NRAS |
| APOH | GP9 | EPO | MASP1 |
| SERPINF2 | GP1BB | EGF | TFPI2 |
| PF4 | SERPINA10 | MGAT2 | ALG6 |
| VKORC1 | PLAU | MPDU1 | PIK3C2A |
| FGG | CYP2C9 | C4BPB | ADAMTSL1 |
| KNG1 | ITGA2 | CCDC115 | CCL2 |
| MTHFR | CXCL8 | TMEM199 | RAF1 |
| TNF | P2RY12 | CSF3 | RBM8A |
| KLKB1 | SSR4 | APOB | PECAM1 |
| CPB2 | SELE | LZTR1 | DPAGT1 |
| SELP | CD46 | MB | NOS3 |
| F2RL1 | ALG2 | AFP | GNA14 |
| PLG | VTN | CD36 | TF |
| IL6 | SERPINA1 | ALG1 | SLC35A1 |
| ALB | HABP2 | HMGB1 | KRAS |
| ITGB3 |  |  |  |

**Supplementary Table 3.**

| **Total known differentially expressed genes of acute pancreatitis analyzed by R language** | | | |
| --- | --- | --- | --- |
| Anxa2 | Mir320 | Serpini1 | Thada |
| Cd44 | Cfl2 | Fahd2a | Themis3 |
| Akr1b8 | Slc35a3 | Gpc1 | Trim30e-ps1 |
| BC022713 | 1700052K11Rik | Serf1 | Slc39a7 |
| Krt18 | Gm1673 | Pomk | Idh1 |
| Krt19 | Golga7 | Lrba | Ei24 |
| Cdh1 | Timm8a1 | Gbx2 | Fcho2 |
| Serpinb6a | Eci3 | Snx22 | Niban3 |
| Homer2 | Cd36 | Pik3c2a | Ubl7 |
| Dstn | Tbc1d1 | Hikeshi | Fgd5 |
| S100a11 | Isoc2b | Cd300lg | Apoc3 |
| Cckar | F2rl1 | Il7 | Art5 |
| Krt8 | Diaph2 | Isg20 | Rab9b |
| Tpm4 | Aspdh | Pmpcb | Trim8 |
| Itpkc | Ppp1r37 | Rc3h2 | Hspbp1 |
| Btg2 | Epg5 | Igfbp2 | Cartpt |
| Rtn4 | Mt1 | Crygc | Gimap6 |
| Map4 | Snx24 | Cilp2 | Bicc1 |
| Emp1 | Ppp1r3d | Zscan26 | Pnpla3 |
| Sat1 | Smim4 | Tmem91 | Zfp575 |
| Gatm | Cgref1 | Inf2 | Tmppe |
| Kel | Sav1 | Zc3h12a | Cmip |
| Ywhah | Cacna1d | Meak7 | Abcc8 |
| Cd9 | Mast3 | Apoa4 | Gng13 |
| Coq8b | Klk1b11 | Pvt1 | Akr1c19 |
| Slc7a8 | Tmem167b | Nudt18 | Slc35a4 |
| Adk | Mrpl55 | Plpp6 | Caskin1 |
| Actn1 | Lonp1 | 9530091C08Rik | Dnajc15 |
| Capn2 | Usp7 | Rnf207 | St8sia6 |
| Rcan1 | Hprt | Slc35e1 | Cacna1g |
| Aass | Mpv17 | A330023F24Rik | Alas2 |
| Wdr1 | Pithd1 | Cabp1 | Snord58b |
| Elovl7 | Elp4 | Gmip | Sema3d |
| Klf6 | Phax | Ugt8a | Adgra2 |
| Hsp90aa1 | Rtbdn | Ttll1 | Mansc1 |
| Bcl2l1 | Foxa2 | Nup35 | Scnm1 |
| Cldn10 | Aplp2 | 1700066B19Rik | Orc2 |
| Efhd2 | Kcnq1 | Slc2a6 | Eid2b |
| Agmo | Klf3 | Spry2 | Sp100 |
| Cldn4 | Ssbp4 | Slc32a1 | Rpl12 |
| Sephs2 | Ier5l | Edaradd | Efcab12 |
| Acadsb | Vax1 | Papola | Tex46 |
| Dusp1 | Zfp3 | Thsd7b | Samd14 |
| Ndrg1 | Drg1 | Olfr836 | Twist1 |
| Gm4750 | Mir341 | Nedd1 | Nubp2 |
| Ivd | Dctn2 | Foxd3 | Cdip1 |
| F11r | Mcmbp | Npffr1 | D330041H03Rik |
| Aldh6a1 | Prrc2c | Fam162a | Fam167b |
| Egfr | C5ar1 | Dhx38 | Nudt7 |
| Ero1b | Gjc2 | Znrf2 | Hebp2 |
| Dbp | AA414768 | Oprd1 | Cldn6 |
| Tent5a | Elp3 | Aasdhppt | Spata25 |
| Lcn2 | Mrpl28 | Fig4 | Foxb1 |
| Tmcc3 | 2610002M06Rik | Pus1 | Tubgcp2 |
| Lrrfip2 | Vgll2 | Rita1 | Mbtd1 |
| Sel1l | Galnt11 | Zfp740 | Nos1ap |
| Plpp2 | Dnajb2 | Shank1 | Asap3 |
| Bet1 | Flot1 | Ppp1r35 | Rpl37a |
| Arap2 | Myo19 | Fitm1 | Iqch |
| Cxadr | Dyrk1a | Sec1 | Ccdc189 |
| Ccdc71l | Smoc1 | Eogt | Kif16b |
| Ccng2 | Shq1 | Uso1 | Map3k7cl |
| Vwa5a | Crygn | Zbtb45 | Zfp35 |
| Flnb | Scmh1 | Csk | Zfp101 |
| Sostdc1 | Gk5 | Mlxip | Acrv1 |
| Ptpn12 | Cdc42bpa | Tradd | Ikzf2 |
| Ptger3 | Mospd3 | Ltbp2 | Dock4 |
| Hmces | Mrpl19 | Abcc1 | Zbtb11os1 |
| Ywhag | Rprl1 | Pyurf | Srcin1 |
| Hmox1 | Gipc1 | Dimt1 | Zfp930 |
| Zwint | Klf7 | Fbxl22 | Spsb2 |
| Mknk1 | Pawr | Mcemp1 | Vps72 |
| Gtpbp4 | Rnmt | Mir30d | Syt16 |
| Ier3 | Fbll1 | Vim | Eif4e |
| Tjp2 | Cdc40 | Clec4n | Cfh |
| Ghr | Zhx1 | Cmas | Nptn |
| Anxa3 | Rel | Eda | Exo5 |
| Actn4 | Rasal2 | Zfp622 | Mir1956 |
| Ift20 | N4bp2l2 | Fgf4 | Pcf11 |
| Slc7a3 | Ube2d2a | Usp42 | H2-M10.5 |
| Map2k3 | Mpst | Adgrl1 | Slc35d2 |
| Appl2 | Spred2 | Jag2 | Npm3-ps1 |
| Actb | Trappc10 | Rbbp5 | Lrrc4c |
| Rhbdf2 | Mir431 | Tmem176b | Mxd1 |
| St14 | G6pc3 | Pgap4 | Clec2l |
| Derl3 | Nampt | Vgll4 | Ugp2 |
| Myo1c | Runx1 | Atp6v1a | Otulinl |
| Gls | Tbcel | Sigirr | Card11 |
| Rap1b | Tomm7 | Zfp280d | Hao2 |
| Cnksr1 | Arl5b | Fbxw9 | Dsg1b |
| Klf15 | Inpp5f | Unc80 | Hba-x |
| Ano6 | Paip2 | Kcnmb4 | Birc3 |
| Clic4 | Epb41l4a | Olfr767 | Plch2 |
| Pvr | Wdr44 | Edn2 | Hcn3 |
| Myh9 | Tmem134 | Tafazzin | Ltn1 |
| Plp2 | Ints10 | Zfr2 | Adam9 |
| Iqgap1 | Ccdc9 | Pla2g2d | Zc2hc1c |
| 4833439L19Rik | Yjefn3 | Ube2w | Gm5779 |
| P2ry14 | Tm7sf2 | Krtap5-3 | Mfsd4b5 |
| Aldh1a7 | Rab5b | Prkra | Lalba |
| Cd14 | Zfp7 | Mocos | Ly86 |
| Myo9b | Msx1 | Mapk8ip1 | Nthl1 |
| Pcca | Pop1 | Oxld1 | Naaa |
| Tax1bp3 | Rabac1 | Sh3glb2 | Kif1c |
| Tmem59 | Arhgap44 | Swap70 | Eif3l |
| Tgif1 | Dcaf11 | Kti12 | Parl |
| Selenop | Flvcr1 | Rnf13 | Naif1 |
| Coro1c | Psmb9 | Zfp810 | Med29 |
| Osmr | Rbx1 | Tigd3 | Klk4 |
| Tpm3 | Tubb2b | Tbl3 | Vmo1 |
| Tmed11 | Ccl7 | Dtx1 | Gtpbp6 |
| Atf3 | Pdcd10 | Crlf3 | Islr |
| Bckdhb | Tuba8 | Lhpp | Mnt |
| Arhgef26 | F13a1 | Fggy | Neu4 |
| Nabp1 | Stbd1 | Scara3 | Steap2 |
| Cdkn1a | Dnaaf1 | Cdk5 | Pcnp |
| Sdf2l1 | Usp19 | Ankrd49 | Trarg1 |
| Gstm2 | Ero1a | Rnf144a | Lrrc31 |
| Ralgds | Wdr3 | Tsen54 | Lhfp |
| Gclc | Dpp7 | 1700013G24Rik | Lars |
| Vcl | Eny2 | Olfr1173 | Smc4 |
| Mccc1 | Cnfn | Ap3m1 | Mrpl3 |
| Ier5 | Trappc14 | Bsx | Ift74 |
| Itga3 | Kat5 | Terc | Dazap1 |
| Adhfe1 | Ltv1 | Fam167a | Fxyd4 |
| Tmsb4x | Lmf1 | Myo6 | Pik3ap1 |
| Cyp39a1 | Nde1 | Zfp638 | Nedd8 |
| Bhlha15 | Fam102b | Spaca4 | Ddx19a |
| Pkp2 | Tor3a | Mrps15 | Grem2 |
| Dsc2 | Riok3 | Gm5150 | Ect2l |
| Crip2 | Sh3glb1 | Cldn19 | B9d1os |
| Lrrn1 | Plcb1 | Ppfia1 | Slc1a1 |
| Sbds | Nedd4l | Ttc39b | Macroh2a1 |
| Clic1 | Nlgn3 | Ern2 | Prss21 |
| Gcnt2 | Cxcl5 | Gm11426 | Glipr1l1 |
| Tspan1 | Akap13 | Syt15 | Rnf225 |
| Ly96 | Insig2 | Eps8 | Ctnna3 |
| Kdm1a | Wdr7 | Xrcc3 | Smim10l2a |
| Mapkapk2 | Lrfn3 | Fntb | Spc25 |
| Shtn1 | Shroom3 | Ptprc | Sh3tc1 |
| Ppp2r2d | Anxa6 | Hkdc1 | Kazn |
| Cog6 | Arl6ip5 | Fbxo7 | Fgf11 |
| Cyb5b | Mysm1 | Alx3 | Tmem63c |
| Taf4b | Gm6899 | Pkm | Myrfl |
| Map3k6 | Ptp4a3 | Cdca7 | Stac2 |
| Cap1 | Rngtt | Ak2 | Ogt |
| Fam83h | Vtn | Cacng8 | Ccdc134 |
| Cdc42ep5 | Stk38l | Acvrl1 | Evc |
| Trp53inp1 | Ext1 | Snora20 | Dmbt1 |
| Sdad1 | Otud1 | Akr1c13 | Slc2a9 |
| Svil | Cetn2 | Peli1 | Spata17 |
| Qser1 | Ttyh1 | Ccnd3-ps | Wnt8b |
| Hibadh | Prkch | Kdm4c | Nostrin |
| Sec11c | 1500002C15Rik | Etv2 | Arl15 |
| Tent5c | Tmem106a | A330008L17Rik | Klhl22 |
| Csrp1 | Rab3a | Xpo5 | Slc34a1 |
| Zbtb10 | Dnajc25 | Insyn1 | Fbxw4 |
| Ceacam1 | Shisa9 | Pfdn4 | Chek2 |
| Clpx | Akr7a5 | Commd7 | Tvp23a |
| Dock11 | Gpr180 | Ahdc1 | Erlin2 |
| Tes | Baz1a | Cenpa | 1700029M20Rik |
| Psmd8 | Pdhb | Hoxb6 | Fzd2 |
| Krt20 | Gtf3c6 | Dcaf5 | Reep6 |
| Tubb6 | Camk2n1 | Srsf3 | Cdh23 |
| B4galt6 | Wbp2 | Ttbk1 | Ppp3cc |
| Fbxw11 | Ssbp3 | Stk11 | Mgmt |
| Phf10 | Brd4 | 0610025J13Rik | Nudt16 |
| Nol10 | Gna12 | Hrh1 | Aqp3 |
| Grb10 | Trp53inp2 | Gfod1 | Olfr1392 |
| Agps | Gm10584 | Mir181b-2 | Ppp2r2b |
| Hadh | Ppcs | Slc46a2 | Psmd3 |
| Meis2 | Eef2kmt | Erc2 | Nfe2l3 |
| Socs6 | Zfp36 | Tm4sf1 | Rgs14 |
| Map4k4 | Sema7a | Vsx1 | Tmem182 |
| Tmsb10 | Matn4 | Gar1 | Zfp746 |
| Elf3 | Fez2 | Wipf3 | A530006G24Rik |
| Rela | Thoc2l | Atp1b1 | Mitd1 |
| Nop58 | Dmrta2 | Mxd4 | Cdh8 |
| Kpna2 | Prorsd1 | Sat2 | Olfr1080 |
| Appl1 | Rnasel | Gramd1b | Pank1 |
| Ppp4r1 | Gadd45g | Tmem143 | BC048644 |
| Zc3hav1 | Prrc2a | Lrrc3 | 9130409I23Rik |
| Smg5 | Znrf1 | Mettl8 | Slc30a8 |
| Tmed4 | Ube2r2 | Kifc2 | Plk5 |
| Sgpp1 | Dnajc8 | Akip1 | Gucy2d |
| Sbno2 | Nrbp1 | Ppid | Ncald |
| Cdcp1 | Tgif2 | Ythdf1 | S100b |
| Fbxo30 | Hs3st6 | Mfsd5 | Cript |
| Plpp3 | Pygo2 | Milr1 | Lrrc32 |
| Fgd6 | Dpm3 | Tmem121 | Htr5a |
| Mob1a | Rph3al | Stk19 | Spint4 |
| Fubp1 | Mir219a-1 | Snx12 | Cyp26c1 |
| Hspa4l | Gng5 | Trpv1 | Tnfrsf9 |
| Stam2 | Chml | Slc25a38 | Prss30 |
| Capg | Alpk1 | Nkx2-1 | Hp |
| Calm2 | Gdf7 | Ddx46 | Eif4e3 |
| Dnajb11 | Tm9sf2 | Fut1 | Nub1 |
| Tnfrsf12a | B4gat1 | Prrg2 | Zbp1 |
| Tmc5 | Gnai1 | Slc7a4 | Hey1 |
| Rab27a | Dcaf8 | Paip1 | Gcm1 |
| Cblb | Hes6 | Col22a1 | Eepd1 |
| Magt1 | Adrb1 | Tada2b | Pla2g12b |
| Nufip1 | Rufy2 | Cttnbp2nl | Ccin |
| Dsp | Zcchc10 | Zfp729b | Xbp1 |
| Gan | Tmem270 | F2 | Ccdc177 |
| Tagln2 | Foxk1 | Rbfox3 | Uprt |
| Prps2 | Ndufv1 | Ccnt1 | Jazf1 |
| Erlec1 | Cep44 | Nkx2-9 | Myom3 |
| Serpina3n | Nvl | Slc52a3 | Mir218-2 |
| Rras2 | Lyz2 | Cmtm7 | Tm7sf3 |
| Parm1 | Qsox1 | Snapc3 | Atf7 |
| Hgs | Fdxacb1 | Vpreb3 | Prr12 |
| Mmut | Tcf25 | Sla | Pgm2l1 |
| Kras | Scaf4 | Kdelr1 | Fer1l6 |
| Arhgef2 | Ccser2 | Cdk5r2 | Sacm1l |
| Tef | 1700022A21Rik | Ifi27 | Pclo |
| Rab11fip5 | Zbtb43 | Polb | Rab11fip2 |
| Ppp2ca | Ppm1k | Hacl1 | Them7 |
| Klb | Aqp8 | Slc36a1 | Ivl |
| Mettl7a1 | Ascc3 | Ptprt | Selenok |
| Rnf5 | Nanp | Pard6g | Secisbp2l |
| Rangap1 | Angptl1 | Ptar1 | Cadps2 |
| Por | Zdhhc24 | Fam110b | Krt74 |
| Arl2bp | Kifap3 | Tmbim4 | Timm21 |
| Slc25a16 | Map4k5 | Zfp385a | Syna |
| Dctn4 | Ulk3 | Olfr279 | Pdlim5 |
| Dot1l | Whrn | Podn | Pars2 |
| Cp | Lypd6b | Tmem234 | Shprh |
| Chchd7 | Egfl8 | Casp2 | Usp3 |
| Ctnna1 | Irgm1 | Mtr | Gipr |
| 2310039H08Rik | Gas6 | 2610008E11Rik | Ccdc126 |
| Fermt2 | Chp1 | Exoc2 | Galnt4 |
| Zyx | Tut1 | Rabggta | Hk1 |
| Msrb1 | Zc3h13 | Anks1 | Osgep |
| Usp2 | Zar1 | Grb2 | Pdgfa |
| Csnk2a2 | 4930431F12Rik | Cops2 | Aldoart2 |
| Mccc2 | Sec61a2 | Agpat2 | Olfr303 |
| Ehd4 | Tmem168 | Slc1a2 | Trappc3 |
| Tmod3 | Mb | 6330407A03Rik | Cyp4f14 |
| Brd2 | Ost4 | Rny1 | Pldi |
| Mir18 | Med14 | Cks2 | Chtf18 |
| Atp11a | Mir296 | Fgf21 | Dxo |
| Pcmtd1 | Psip1 | Xrcc5 | Galm |
| Plec | Slc30a2 | Plxnd1 | Metap1d |
| Dnajc12 | Tfcp2l1 | Ilvbl | Olfr820 |
| Srxn1 | Mgat1 | Cyp2u1 | Mia |
| Thbs1 | Marveld3 | Tmem132c | Coch |
| Rock2 | Bcl2l12 | Zmat5 | Olfr172 |
| Tmbim1 | Commd5 | Irx1 | Map1lc3b |
| Pprc1 | Emc7 | Fbxw17 | Gkn2 |
| Rnf19b | Tk2 | Arhgap33os | Gm382 |
| Nfil3 | Nmi | Bmp4 | Sart1 |
| Carhsp1 | Zdhhc6 | Car2 | Mrps11 |
| Fnbp1l | Ppm1g | Aunip | Ring1 |
| Map3k5 | Zdhhc21 | Grk5 | Mir99ahg |
| Sesn1 | Rapgef2 | Mast4 | H4c8 |
| Polr3k | Hmga1 | Mdfi | Rab5if |
| Stard7 | H1f0 | Xpr1 | Cyp4f37 |
| Acsl4 | Kif26a | Cdh24 | Mrgprx1 |
| Stk39 | Npw | Plxdc1 | Mafb |
| Nras | Ccdc58 | Ndfip2 | Dcakd |
| Notch2 | Cnot6 | Fastkd1 | D2hgdh |
| Sft2d2 | Atg4a | Chrm5 | Slurp2 |
| Ptk2b | Slc35a2 | Sgk3 | Zfyve26 |
| Dap | Snx19 | Zfp574 | Samt4 |
| Gprc5a | Cox7a2 | Ubald1 | Lhx2 |
| Anxa5 | Snora3 | Tab2 | Shh |
| Eif1a | Nfkb2 | Ifitm1 | Olfr66 |
| Ccpg1 | Kdm3a | Pum2 | Tcam1 |
| Zfand2a | Taf11 | Ilrun | Olfr367-ps |
| Cnpy2 | Tmem218 | Klk1b9 | Lrfn1 |
| Slc46a3 | Dusp22 | Fis1 | Ypel1 |
| Ddx39a | Samd4b | Mllt3 | Fam43a |
| Il13ra1 | Ide | Lrp10 | Mrpl51 |
| Hspa13 | Zfp655 | Parp11 | Exoc3l4 |
| Fxyd5 | Slc25a43 | Nynrin | Kcnj8 |
| Ripk1 | Tnip2 | Olfr462 | Kcnd1 |
| Ccl9 | Phb2 | Ppargc1b | Kctd13 |
| Tbccd1 | Dus3l | Plxna2 | Dgcr2 |
| Tirap | Ogdh | H2-Eb1 | Fgf22 |
| Fdx1 | Atp9b | Tspan6 | Ap5s1 |
| Acat1 | Eif2ak1 | Cables2 | Ccdc93 |
| Ptpn23 | Copb2 | Galnt9 | Aprt |
| Got1 | Fgf15 | Rem1 | Suds3 |
| Ms4a4a | Prdx1 | Paqr8 | Map2k5 |
| Tecr | Fthl17a | Btrc | Stmn2 |
| Isca1 | Jtb | Golga3 | R3hdm2 |
| Qdpr | Ttc34 | Adamts16 | Cfap300 |
| Pdcd4 | Acot10 | Usf3 | Six6 |
| Pccb | Mpped1 | Tlcd2 | Shisal2a |
| Cttn | Prr13 | Xrcc1 | Ngf |
| Msn | Siglec15 | Atp5pb | Baz2a |
| Wdr72 | Exosc1 | Fbln1 | Wwtr1 |
| Gamt | Ccm2 | Fuom | Pmp22 |
| Oga | Lipa | Phactr3 | Gspt2 |
| Itgb1 | Cdkl2 | Nfkbia | Zdhhc9 |
| Ocln | Chrm1 | Olfr747 | Mir679 |
| Cfl1 | Ckap5 | Ccdc85b | C130021I20Rik |
| Uhrf1bp1l | Ints8 | Coro1b | Hirip3 |
| Ccnl1 | Tex261 | Ccno | Celsr1 |
| Bcat2 | H6pd | Tex43 | Tmem178b |
| Eps15 | Fgf14 | Slc26a6 | Nudt16l2 |
| Mex3c | Spata5 | Ints2 | Mab21l3 |
| Ctsl | H2-Q4 | Mst1 | Gulp1 |
| Ralgps2 | Htra3 | Rnf148 | Neurod4 |
| Uba3 | Bax | Fbxo38 | Mall |
| Dbt | Bcl11b | Kcnh4 | Olfr92 |
| Tram1 | Smim15 | Pimreg | Ptpru |
| Ttc27 | Slc35e3 | Lurap1l | Cfap57 |
| Ccnyl1 | Ccdc141 | Surf2 | Helt |
| Usp14 | Rab29 | Slc16a13 | Olfr121 |
| Os9 | Mir185 | Lrrc39 | Lrriq3 |
| Ets2 | Fzd10 | Deaf1 | Oard1 |
| Dst | Ttc37 | Snora33 | 1700018B24Rik |
| Man2a1 | Col2a1 | Hoxd3 | Btf3 |
| Pah | Bap1 | Ppp1r3f | Col3a1 |
| Anp32b | Ctdspl2 | Tubd1 | Tmem47 |
| Ugcg | Vma21 | Uhmk1 | Olfr545 |
| Padi2 | Ggt1 | Kansl2 | Lag3 |
| Smpdl3a | Akt2 | Dok7 | Lmo2 |
| Ehhadh | Ppp6r2 | Chst11 | Mir670 |
| Ppib | Nrsn2 | Alkal1 | Rtl3 |
| Nmt2 | Esf1 | Zfyve16 | Pck2 |
| Akt3 | Ifit3 | Surf6 | 4933412E24Rik |
| Lpgat1 | Marveld1 | Jph3 | Psmd13 |
| Txn1 | Epn1 | Scrn2 | H2bc8 |
| Ndufb9 | Nop2 | Mir122 | Krt14 |
| Lasp1 | Gja1 | Pspc1 | Barhl2 |
| Serpini2 | Trnp1 | Dio1 | 1110004F10Rik |
| Hspb1 | Srms | Olfr143 | Olfr714 |
| Tbc1d25 | Atox1 | Plekhm1 | Sox11 |
| Ppp4r3a | Hs3st4 | Lyn | Otud3 |
| Fhip1b | Smad4 | Lce3c | Usp49 |
| Anpep | Aarsd1 | Wdr33 | Tigar |
| Stk40 | Aurkc | Ptprk | Olfr470 |
| Cep170 | Dhodh | Rims1 | Nhej1 |
| Plin2 | Rab31 | Nrip3 | Pcsk1 |
| Thoc1 | Dapk1 | Amigo3 | Clip2 |
| Phkb | Mcur1 | Cdt1 | Brinp2 |
| Mdh1 | Trim41 | Gfra4 | Rp9 |
| Tmem97 | Arhgap23 | Edn1 | Polr1a |
| Nr3c2 | Maip1 | Ednra | Mtmr7 |
| Jup | Serpinb8 | Spata33 | Slco2a1 |
| Plaur | Gal3st3 | Bahd1 | Ppbp |
| Noc3l | Rit1 | Pam | Ldhd |
| Rhoc | Mvk | Txnl1 | C330024D21Rik |
| Spire1 | Tshz1 | Gm14725 | Wfdc13 |
| Gabpb1 | Imp3 | Nudt14 | Smcr8 |
| Fat1 | Mpnd | Bbc3 | Slc12a4 |
| Slk | Efnb3 | Zfp39 | Ctu2 |
| Mcee | Lancl1 | Gcc2 | Soga1 |
| Dusp10 | St3gal3 | Gpr27 | Foxj1 |
| Tpm1 | Mir483 | Tmem179 | Ifnlr1 |
| Bche | Ppwd1 | Slc16a6 | Pi16 |
| Arhgef5 | Strn4 | Fam169a | Ang6 |
| Oser1 | Emd | E2f2 | Ankrd27 |
| Arrdc4 | Guk1 | Tyrobp | Atg4b |
| Plekhf2 | Tbpl1 | Stat5b | Vdac1 |
| Creb3l1 | Zg16 | Tcp11l2 | Sap18 |
| Nabp2 | Kansl1 | Col6a2 | BC107364 |
| Kansl3 | Pde12 | Kcnk4 | Slc29a2 |
| Mdn1 | Rny3 | Tmem208 | Epm2a |
| Pdk1 | Hmx3 | Bbs2 | Mettl22 |
| Zdhhc20 | Pde9a | Gpaa1 | Tspan18 |
| Pak1 | Zfyve9 | Pdlim4 | Ubxn6 |
| Cand1 | Foxj2 | Xylb | Nupl2 |
| Morc4 | Rbm19 | Slc15a3 | Ptger1 |
| Lsg1 | Il1r1 | Fzd6 | Eaf1 |
| Fkbp11 | Tmem192 | Mfsd10 | Ghitm |
| Ano1 | Chdh | Il20rb | Shank2 |
| Ppfibp1 | Prpf39 | C2cd3 | Itih2 |
| Cnih4 | Map3k11 | Fam166b | Bcdin3d |
| Dnaaf9 | Eif3d | Ankrd29 | Cd101 |
| Cnppd1 | Ube2t | Knop1 | 1700034H15Rik |
| Ggta1 | Stambpl1 | Ifitm3 | 1700001O22Rik |
| Prdx4 | Plin4 | Pigr | Olfr1135 |
| Eif2b3 | Sdf4 | Mpi | Acaa2 |
| Per3 | Angel2 | Rprml | Iffo1 |
| Tnfrsf1a | Atf6 | Ptpn4 | Gm40548 |
| Flna | Sorl1 | Pias2 | Wiz |
| Hsp90ab1 | Sertad1 | Mest | Gm15348 |
| Atraid | Zfp36l2 | Hottip | Imp4 |
| Mapkapk3 | Mlec | Slirp | Foxa1 |
| Serp1 | C1ql2 | Cd209d | Itih5 |
| Sptlc2 | Shisa4 | Nin | Crat |
| Hspa4 | Mmp2 | Fezf1 | Abcc12 |
| Iscu | Wls | Serpinh1 | 1700003O11Rik |
| Dmtf1 | Mef2a | Crb2 | Phf14 |
| Dhrs3 | Mrpl23 | Tasor | Cnbp |
| Rnf11 | Map2k6 | Fst | Cept1 |
| Cert1 | Med11 | Casd1 | Ttf1 |
| Memo1 | Ubc | Ifna16 | Erc1 |
| Ctbp2 | Tpgs1 | Slc12a9 | Hyal3 |
| Mettl26 | Sike1 | Dscam | Ndufb2 |
| Skil | Mxi1 | Atf2 | Lao1 |
| Myd88 | Nkx2-5 | Abhd11 | Kcnb1 |
| Trmt10a | Lmbrd2 | Sucla2 | Zfp879 |
| Sgk1 | Adrb2 | Tcta | Igf2 |
| Lrrc8a | Nbeal2 | Spsb4 | Tstd3 |
| Tex10 | Srp19 | Il2rg | Marcksl1 |
| Ssx2ip | Ggact | Bud31 | Olfr1444 |
| Cldn7 | Tom1l1 | Dcaf1 | Ly9 |
| Glrx2 | Tbk1 | Wdr74 | Adck2 |
| Slc25a35 | Psmd10 | Als2cl | Gsta4 |
| Pmepa1 | Mcam | Timm29 | Rpl13 |
| Hmgcr | Fam43b | Gmcl1 | Rps18 |
| Sec62 | Actl10 | Rgs9bp | Emg1 |
| Rrp15 | Ints12 | Rictor | Cltb |
| Gstm1 | Zfp142 | 8030423F21Rik | Akr1e1 |
| Tiprl | Fcgr1 | Eloc | L3mbtl2 |
| Ptbp3 | Sparcl1 | Tomm40l | Ppp5c |
| Clic6 | Ocstamp | Colec11 | Plac8l1 |
| Epcam | Rbis | Gm14403 | Flvcr2 |
| Grpr | Mark3 | Mtrex | Samd4 |
| Pdcd6ip | Magix | Dffa | Gramd1c |
| Rhob | Man1a | Grk2 | Dkkl1 |
| Erich5 | Paox | Mgll | Mr1 |
| Ctrc | Nom1 | Irak2 | Ptx4 |
| Gtf2ird1 | Id4 | Rgl2 | Ehbp1l1 |
| Pik3r1 | Prpf40b | Selenoh | Mir672 |
| Appbp2 | Cnep1r1 | Plac9 | Hdac2 |
| Pcbd1 | Crtc2 | Slbp | Prss43 |
| Reep5 | Psma3 | Zfp423 | Gm11565 |
| Rps6kb1 | Cftr | Lactbl1 | Zbtb12 |
| Ptpn2 | Grb7 | Evpl | Card14 |
| Tnfrsf23 | Ccdc153 | Fgf9 | Rnf128 |
| Slc25a24 | Tbkbp1 | Ndufa7 | Nfasc |
| Gnl2 | Zfp13 | Mmp8 | Nrn1 |
| Vcan | Ccnq | Nrn1l | C2cd2 |
| Mia3 | Ino80c | Lhx4 | Sh3gl3 |
| Slc7a1 | Egr3 | D630003M21Rik | Ubxn10 |
| Elapor1 | 2510002D24Rik | Usp48 | Zmym3 |
| Iws1 | Eri2 | 2310057M21Rik | Rab8b |
| Tubb4b | Krtcap2 | Syndig1l | Dcst1 |
| Il17ra | Pnrc2 | Rhoh | Bex2 |
| Suclg2 | Rflna | Col26a1 | Skp2 |
| Tmem131l | Chd9 | Ccdc174 | 4921504E06Rik |
| Itga6 | Pip5k1a | Laptm5 | Dpy30 |
| Nnt | Cbx5 | Hcls1 | Kcnrg |
| Rps6ka3 | Cd3eap | Vkorc1l1 | Asxl2 |
| Cct8 | Mbnl1 | Ppp1r11 | Vegfa |
| Tjp1 | Tspyl4 | Trmt44 | Ncoa2 |
| Gars | Trim68 | Nuak1 | Wdr55 |
| Tob1 | Peg12 | Chst12 | Mcu |
| Arhgap28 | E2f5 | Stc2 | Arrdc3 |
| Ppp2r1b | Gtf2h1 | Mcm3 | Cabp4 |
| Esyt1 | Cebpb | Prepl | Tnfsf10 |
| Creld2 | Timm8b | Ubqln4 | Gm6815 |
| Ddx10 | Clcn7 | Oprk1 | Trpm7 |
| Sf3b3 | Slfn5 | Bbx | Ppil2 |
| Arpc2 | Mtpap | Kat7 | Ext2 |
| Bckdha | Fgd2 | Entr1 | Rgl3 |
| Echs1 | R3hdm4 | Nkx2-6 | Cyb5r3 |
| Fkbp2 | Foxb2 | Tha1 | Taar5 |
| Acvr1 | Senp5 | Pigq | Asic4 |
| Cldn8 | Gtf3a | Frmpd1 | Ms4a20 |
| Ak3 | Agtr1b | Prpf38a | Me3 |
| Prr15l | Emc10 | Tspan12 | Pcid2 |
| Cars | Cops7a | Eno3 | Kctd19 |
| Simc1 | Adamts1 | Arl14epl | Hnrnpa2b1 |
| Hbegf | Gm5617 | Dlec1 | Rrp8 |
| Slu7 | Kdm5b | Fam166c | Enox2 |
| Kpna4 | Crybb1 | Alkbh2 | Gm9776 |
| Timp1 | Pum1 | Rnf186 | Colgalt1 |
| Npc1 | Mypop | Rps15 | Olfr690 |
| Zpr1 | Ccdc112 | Gpr135 | Hcn4 |
| Abhd2 | Mtm1 | Foxk2 | 4930581F22Rik |
| Ube2o | Lmbrd1 | Spag6 | Tmem29 |
| Kif3a | Sidt2 | Ighv1-84 | Rpl10l |
| Blmh | Aldoa | Tmem231 | Tcl1 |
| Rnasek | Ccr5 | Trpc1 | Cwc15 |
| Abca8a | Eif4ebp1 | Mtg1 | Bid |
| Cebpg | Rab3d | Sipa1 | Ptges |
| Dhx32 | Gsto1 | Xkr4 | Smim11 |
| Cul1 | Dnajc13 | Zfc3h1 | St8sia2 |
| Eppk1 | Naa38 | Synm | Grk4 |
| Lbh | Zfp251 | Igf1r | Syt2 |
| Utp20 | Sacs | Mgst1 | Fgf3 |
| Pbld1 | Maob | Ddx52 | Myo15 |
| Gstt3 | Nat2 | Mga | Midn |
| Tmem39a | Smim1 | Nab2 | Kcnf1 |
| Cdc123 | Dmpk | Hnrnpu | Olfr444 |
| Ubap1 | Bach1 | Med23 | Cyp51 |
| Wipi2 | Ddx56 | Actl6b | 2700049A03Rik |
| Myo5a | Entpd4 | Fau | Mrpl10 |
| Tle4 | Eef1akmt3 | Ldb3 | Crh |
| Tle5 | Mgat4b | Ctsa | Upk1b |
| Enpp5 | Sp9 | Dusp8 | Ifit2 |
| Csnk1d | Zfp568 | Pde6d | Btbd16 |
| Zfp52 | Zfp128 | Tmem238 | Ostf1 |
| Tbc1d9 | Cebpd | C2cd2l | Gpr88 |
| Lman1 | Cebpa | Zfp597 | Unc5b |
| Fbxo3 | Iftap | Vill | Krt82 |
| Heatr1 | Mir3107 | Vsig2 | Itgad |
| Sesn2 | 4930599N23Rik | R3hdml | Map3k7 |
| Las1l | Adap2 | Lum | Rnf113a1 |
| Gnai3 | Ell2 | Tbc1d10c | Ralbp1 |
| Cfdp1 | Rprl2 | Grm6 | Ly6g6g |
| Pea15a | AW822252 | Ephb2 | Zfp358 |
| Txndc11 | Cox5b | Kdm6b | Fgf12 |
| Spcs2 | Cish | Bace1 | Fam102a |
| Aatf | Col11a2 | Zbtb5 | Gpr176 |
| Il6st | Mettl23 | Slc9a3r1 | Upb1 |
| Chka | Zdhhc1 | Stx1a | Ccer1 |
| Gmeb2 | Ints13 | Dnajc6 | 3300002I08Rik |
| Arpc5 | Ints6l | Myom1 | Mrm2 |
| Flii | Slc25a1 | Tmem63a | Dpf1 |
| Msmo1 | Cst3 | Pelo | Fgf18 |
| Ces1d | Crkl | Slco2b1 | V1ra8 |
| Anapc2 | Nup160 | A430033K04Rik | Olfr1502 |
| Ldha | Eri3 | Grn | Dnai2 |
| Tspan13 | Lama4 | Nrp2 | Ttll10 |
| Phldb2 | Tab3 | Cnot1 | Pyroxd2 |
| Oxct1 | Yeats4 | Cops6 | Kcnu1 |
| Ro60 | Anxa10 | C9orf72 | Lamb2 |
| Ctsb | Plpp5 | Phgdh | Teddm2 |
| Mthfd1l | Mul1 | Klhl31 | Fezf2 |
| Gatd3a | Hnf4a | Pnoc | Zfp282 |
| Gucd1 | Alg5 | Vax2 | Zbtb39 |
| Slc15a4 | Med8 | Alg10b | Mir195a |
| Hook1 | Csrnp1 | Tmem127 | Adh6-ps1 |
| Gsta3 | Arih2 | Hmg20b | Zyg11a |
| Gstk1 | Btbd2 | Sox14 | Lrwd1 |
| Ddx21 | Ppm1l | Nkiras1 | Aldh3a2 |
| Nck2 | Mt2 | Actrt3 | Zfp512b |
| Exoc6b | Stard13 | Nus1 | Fam229b |
| Slc39a6 | Cldn11 | Xxylt1 | Olfr482 |
| Cbr1 | Picalm | Fbrsl1 | Npepl1 |
| Tac1 | Hectd2 | Zfp777 | Nucks1 |
| Cast | Mrpl24 | Tmem185b | Dcun1d5 |
| Tsr1 | Gnas | Agrp | Noto |
| Dis3 | Porcn | Rgs20 | Pnpla6 |
| Muc1 | Dsg2 | Dmxl2 | Clec4a3 |
| Smim24 | Tmem9 | Anxa4 | Sh3bp1 |
| Smad3 | Mgat5 | Rnase2b | Pkp1 |
| Cyb5a | Tnks2 | Plekhg1 | Asic1 |
| Tbrg1 | Ankrd46 | Dvl1 | Psmc2 |
| Hspa8 | Rmdn2 | Hdgf | Mynn |
| Fbxo8 | Megf6 | Necab3 | Irak1bp1 |
| Ric8a | Pola2 | Efs | A930005H10Rik |
| Smim10l1 | Pde10a | Faf2 | Cxcl1 |
| Aldh1a2 | Vstm2l | Nkx2-3 | Catsperd |
| Fxyd1 | Mir26b | Atp6v1g2 | Zfp82 |
| Mob3a | COX2 | Hsh2d | Odf3 |
| Itpr2 | Padi3 | Vps16 | Pym1 |
| Slc38a3 | Lhx3 | Arrb1 | Espn |
| Spcs3 | Pcsk1n | Gm9901 | 5330439B14Rik |
| Smim19 | 4930404N11Rik | Gmds | Optc |
| Erbb3 | AB041806 | Nr1h2 | Rbm12b2 |
| Dad1 | Ankmy2 | Rdm1 | Zc3hc1 |
| Rbpjl | Prr18 | Lhfpl4 | Olfr1138 |
| Prep | Mir194-1 | Eif4g2 | Ppp1r21 |
| Trib3 | Taf1d | Map3k2 | Zfp747 |
| Tmem43 | Psmb1 | Grid2ip | Coa7 |
| Krt7 | Grk6 | Ccl25 | Kidins220 |
| Pgk1 | Nxph2 | Tmed5 | 4930513O06Rik |
| Dnajc3 | Ifi27l2b | Cep120 | Heatr5b |
| Rbl2 | Qrich1 | Tmem80 | BC006965 |
| Upf1 | Lzts3 | Kcnh1 | Lrfn4 |
| Slc50a1 | Cstf3 | Rdh8 | Cnot7 |
| Zdhhc13 | Clasp2 | Smarcd1 | Bcr |
| Uhrf2 | Lrrc75b | Rnf223 | Angpt2 |
| Mcrip2 | Aamp | Cxcl17 | 4933408J17Rik |
| Nfyb | Rnh1 | H2-K2 | Pbx4 |
| Ivns1abp | Rbfa | Acer1 | Rec114 |
| Lgals12 | Vangl1 | Tesk2 | Gm5589 |
| Eif4a1 | Edc3 | Ddx51 | Pxylp1 |
| Nsd2 | Elf1 | Tarm1 | Adgrg1 |
| Elf4 | Atp6v1d | Rptor | Olfr1496 |
| Gnmt | Macc1 | Ccs | Zfp57 |
| Serpinb1a | Pde5a | Msantd2 | Plbd1 |
| Cdadc1 | Scarf2 | Amer2 | Pramel23 |
| Hnrnpf | Fnip1 | Tbx3 | Gyg |
| Maco1 | Eftud2 | Get3 | Catsperb |
| Nol9 | Atad1 | Ublcp1 | Kdm5d |
| Eda2r | Mink1 | Bcorl1 | Apobec2 |
| Dynll2 | Mir212 | Aph1b | Clec16a |
| Mettl9 | Dusp14 | Sh3bgrl2 | Gli3 |
| Ctsz | Hsbp1 | Fam163b | Gtsf1 |
| Ercc1 | Ccdc85c | Dpep1 | Pi4kb |
| Yipf5 | Btbd7 | Osbpl3 | Foxl1 |
| Tc2n | Stom | Adat1 | Oas1f |
| Clasp1 | Btf3l4 | Slc30a3 | Rsrp1 |
| Gstm3 | Rmnd5a | Ooep | Map3k4 |
| Antxr2 | Slfn4 | Ptpmt1 | Zc3h15 |
| Nes | Acap2 | Gpn1 | Plekho2 |
| Stat6 | Cyp2j6 | Epb41 | Cap2 |
| Btbd9 | Espnl | Ralgapa1 | Spaca3 |
| Cdk9 | Cacng4 | Mrps12 | Wnt4 |
| Timm17b | 4930523C07Rik | Wap | Med18 |
| Sgms2 | Zbtb11 | Icam5 | Olfr1306 |
| Kpna3 | Homer1 | Hoxa10 | Srebf1 |
| Nae1 | Ctsf | Zfp945 | Dhx35 |
| Erap1 | Rnf25 | Mrpl16 | Khdrbs2 |
| Ndufb11 | Apobec3 | Arhgef16 | 1700008O03Rik |
| Pxdc1 | Sfr1 | Ddias | Tyk2 |
| Ncs1 | Ints14 | Timm10 | Bdnf |
| Tmed10 | Eif4e2 | Vps35 | Olfr1262 |
| H1f2 | Spata2l | Asrgl1 | Prph |
| Copz1 | Prdx5 | Rab28 | Chtop |
| Yars2 | Tm9sf1 | Ccdc121 | Hoxc4 |
| Fads1 | Col13a1 | Pcdhb2 | Olfr975 |
| Atp6v1b2 | Tmco4 | Nat14 | Mapk12 |
| Far1 | Rpf2 | 4931440P22Rik | Ddx54 |
| Lfng | Tox4 | Vav1 | Bzw2 |
| Irf6 | Mbd1 | Abraxas2 | Llph |
| Slc7a2 | Hspa1a | Efcc1 | Zfp952 |
| Ddhd2 | Lrrc41 | B4galnt1 | Mfhas1 |
| Ptprn2 | Htatsf1 | Anapc4 | Mrps35 |
| Elp5 | Lims2 | Hand2 | Tex2 |
| Lcat | Ptpn1 | Ssb | Sdk1 |
| Mrpl18 | Tnfsf11 | Mtfp1 | Olfr1037 |
| Sh3bp2 | Rbm6 | Sdr42e1 | Slc22a20 |
| Adss | Mir188 | Thap12 | Ighg3 |
| Litaf | Kat2a | Nsf | Gale |
| Farp1 | Slc16a5 | Fam83e | Ctr9 |
| Aldh1l2 | Tff1 | Cuedc2 | Ifi44l |
| Daam1 | Sirt4 | Arhgap32 | Phf20 |
| Tasor2 | Hsd17b12 | Tmem51 | Ppif |
| Sptssa | Cog5 | Rpl13a | Ankrd42 |
| Mrps21 | Tinagl1 | Ift140 | Ccdc61 |
| Dnm2 | Slc7a11 | Fbxw24 | Tspan7 |
| Coq9 | 2810410L24Rik | Ino80 | Apobr |
| Nsg1 | 1810055G02Rik | Decr2 | Edn3 |
| Acad8 | Tmem147 | Tmprss9 | Dipk1b |
| Map2k4 | Wdr73 | Nog | Cep126 |
| Slc22a23 | Etfdh | Mtf1 | Miox |
| Ezr | Aldh4a1 | Tmem214 | Atp5a1 |
| Flot2 | Ube2d3 | Prss29 | Cideb |
| Kif2a | Asb6 | Hnrnpul2 | Elk3 |
| Gcn1 | R3hcc1l | Ttc32 | Dydc1 |
| Hmgb3 | Cenpt | Pgrmc2 | Tomm5 |
| Sepsecs | Sgsm1 | Polr2d | Polr3b |
| Klhl28 | Map2k1 | Nkap | Yeats2 |
| Prdm4 | Gstt1 | Cdc5l | Etv1 |
| Phlpp1 | Ctdspl | Tsr3 | Hhipl2 |
| Cyp3a13 | Serpine2 | Gins4 | Fam124a |
| Oxsr1 | Hsph1 | Ccnd3 | Olfr62 |
| Hamp2 | Ndrg3 | Ky | Rgs10 |
| Smurf1 | Ppp4r3b | Hus1 | Rpl3 |
| Tmed6 | Trmt10c | Pa2g4 | Clec12b |
| Asnsd1 | Epha7 | Scarf1 | Fam91a1 |
| Stk3 | Smyd2 | Neurl1a | Figla |
| Usp43 | Zmpste24 | Myh14 | Tnfrsf13c |
| Galnt3 | Heatr6 | Asxl1 | Dennd2d |
| Marchf7 | Gnptab | Olfr284 | Fbxo33 |
| Wsb1 | Sbno1 | Dnajc18 | Notch1 |
| Prkaa1 | H4f16 | Tfap2e | Hdac1 |
| Lyar | Rbm4b | Zfp385c | C1d |
| Fam83g | Plac8 | Taok3 | Lpxn |
| Tead1 | Jsrp1 | Srfbp1 | Gimap7 |
| Slc33a1 | Nptx2 | Rad18 | Rasip1 |
| Fam118a | Efcab15 | Tnfrsf1b | Atp2c2 |
| Polk | Insr | Plekha2 | Psg18 |
| Rars | Emc6 | 1700028I16Rik | Olfr1508 |
| Dusp16 | Fkbp8 | Gnpat | Olfr1277 |
| Resf1 | Lrmda | Trappc6b | Spem2 |
| Cuta | Evl | Cdc20 | Sh3yl1 |
| Nmd3 | Rad54l2 | Ube2g2 | Zfp207 |
| Eif2s1 | Mre11a | Tsc22d4 | Scaf11 |
| Ppp1r1b | Mir326 | Sharpin | Vamp3 |
| Rab23 | Ifi203 | Nbl1 | Dazl |
| Vkorc1 | Ccr1 | Bag4 | Lipn |
| Slc3a2 | Coa8 | Gatd1 | Ifna5 |
| Stat3 | Ndufa12 | Def8 | Fermt1 |
| Fjx1 | Exosc5 | Snord82 | Tbx10 |
| Socs4 | Mrpl36 | Cdcp3 | Cdcp2 |
| Rab35 | Zswim4 | Ccdc192 | Adamts4 |
| Clk4 | Crybb2 | Zdhhc22 | Myo7a |
| Mthfr | Ppt1 | Plekha7 | Ly6h |
| Hibch | 9030624G23Rik | Spock3 | Zfhx4 |
| Kyat3 | Pskh1 | Bpifb5 | Cmtr2 |
| Map1b | L3mbtl3 | Hacd2 | Mroh9 |
| Ehd2 | Rheb | Car13 | Golm2 |
| Srf | L1cam | Trappc11 | Map10 |
| Smc5 | Nfkbil1 | Olfr1036 | Olfr1342 |
| Fundc1 | Zfp395 | Smug1 | 6330409D20Rik |
| Slc6a6 | Crtac1 | Lgi2 | Ptprf |
| Mpv17l | Ctnnal1 | Canx | Cnn3 |
| Chpt1 | Nid1 | Retreg2 | Slc2a4 |
| Airn | Mgat2 | Ndor1 | Disc1 |
| P4ha2 | Zranb3 | Cdc14a | Slc4a10 |
| Lif | Myh7b | AW549877 | Sin3b |
| Pdlim1 | Gm19924 | Magoh | Prrx2 |
| Rnps1 | Ptcd3 | Uhrf1bp1 | Ddx55 |
| Baiap2l1 | Btbd1 | Tbc1d15 | Gm12888 |
| Nol11 | Dag1 | Tinf2 | Mir193a |
| Rap2b | Ptbp2 | Cs | Padi4 |
| Retreg1 | Sfxn5 | Cntn2 | Mitf |
| Crk | Ift52 | Zfp768 | Gm15612 |
| Gtf2i | Slc35c2 | Slx4 | St8sia3 |
| Tubb5 | Tpbgl | Fibcd1 | Gm16062 |
| Mir17 | Utp23 | Wdr6 | Abhd16b |
| Morc2a | Cryab | Lgals1 | Pcnx3 |
| Sfxn2 | Trim28 | Tcof1 | Mcpt8 |
| Arl8a | Lonrf1 | Capn5 | Bmp8a |
| Pcmtd2 | Ern1 | Ptdss2 | Gm1604b |
| Mfsd4a | Ccl11 | Bptf | Gtf2e2 |
| Iyd | Fam117a | Tnpo1 | Ccdc42 |
| Ints9 | Desi2 | Acad10 | Pgf |
| Naa15 | Ms4a15 | Asf1a | Tcp11l1 |
| Kpnb1 | Bdp1 | Srprb | Dhx29 |
| Wdr48 | Tbc1d4 | Adam11 | Acads |
| Zfp553 | Rad17 | Gga3 | Ppp4c |
| Ppp4r4 | Six5 | Gh | Ube2ql1 |
| Nrf1 | Pmm1 | Zfp354b | Nrbp2 |
| Nfia | Rabif | Prtn3 | G3bp1 |
| Ap2a2 | Nip7 | Hoxd13 | Slc25a34 |
| Uba6 | Ntn1 | Kmt2b | Katnb1 |
| Abhd14b | Abcc10 | Zup1 | Bicral |
| Prom2 | Smarcad1 | Ube2e1 | Mapk15 |
| Plekha1 | Pcna | Atg9a | Usp13 |
| Ndrg2 | Msr1 | Plvap | Mogat2 |
| Xrn2 | Aqr | BC051019 | Nudc |
| Agfg1 | Magi1 | Foxo6 | BC034090 |
| Btc | Rasa1 | Ccdc127 | Agpat1 |
| Chst2 | Pax2 | Idnk | Snrpc |
| Fem1c | Mir23a | Relch | Cdkn2b |
| Tvp23b | Eva1a | Bco1 | Tns4 |
| Qsox2 | Sarnp | Gata5 | Rcvrn |
| Prkx | Tead2 | Setd7 | Gpha2 |
| Rap1gds1 | Rap2c | Ltb | Trim12a |
| Mal2 | Lrrc47 | Slc22a5 | Tatdn3 |
| Isoc1 | Krt33b | Tpd52 | Ppp1r12a |
| Sdhb | Prickle3 | Irgc1 | Fancb |
| Nipal1 | Smarcd2 | Rnf39 | H2ac6 |
| Hspbap1 | Shisa2 | Fyco1 | AI854703 |
| Etfa | Clptm1 | Tiam1 | Myrf |
| Mpp1 | Ms4a4c | Snrpf | Ddit3 |
| Acbd3 | Tmprss3 | Actl7b | Otx2 |
| Pfkp | Snapc1 | Pafah1b3 | Map3k21 |
| Cirbp | Adm2 | Gk | Dapl1 |
| Nkapd1 | Edc4 | Zc2hc1a | Eef2k |
| Cd68 | Lbx1 | Cldn22 | Dhfr |
| Atp5h | Rsl1d1 | Gnai2 | H4c6 |
| Bhlhe40 | Frmd4b | Twsg1 | Lmnb1 |
| Jcad | 2510009E07Rik | Atxn1 | Kcnj9 |
| Prxl2a | Zc3hav1l | Rpl38 | Pot1b |
| Furin | Asph | Slc16a11 | Elac2 |
| Ttc38 | Syvn1 | Mfsd7a | Mbd6 |
| Tceal9 | Hivep1 | Uba2 | Nalf2 |
| Usp12 | Nkx6-2 | Itpripl1 | Kcnab2 |
| Gna14 | Thoc2 | Cox8b | Cntnap1 |
| Carmil1 | Derl2 | Rplp2 | Ydjc |
| Rint1 | Atp6v1e1 | Bmyc | Klc3 |
| Cpeb2 | Sell | Mmp15 | Cobl |
| Mybbp1a | Txndc9 | Afap1 | Pramel12 |
| Mapre1 | Diablo | Ccnj | Mbip |
| Taf15 | E130308A19Rik | Septin1 | Kcnc1 |
| Ndufs7 | Cpsf6 | 1700030C10Rik | Ugt2b37 |
| Mast2 | Utp14a | Map3k9 | Myh6 |
| Faxc | Eci2 | Trpm1 | Zfp414 |
| Trmt61a | Atp5mpl | Spi1 | Pdia2 |
| Hmgb2 | Rnf111 | Hoxb13 | Pigs |
| Me1 | Ccl2 | Dlx3 | Rln3 |
| Bcl10 | Dhx37 | Glrx3 | Vasn |
| Hsdl1 | Gm10782 | Mir490 | Lair1 |
| Psd4 | Kdelr3 | Ssh2 | P4ha1 |
| Yipf6 | Snap47 | Asb16 | Glp1r |
| Hacd1 | Ccdc68 | Kcnj14 | Akirin2 |
| Sec22b | Slc13a3 | Nmnat3 | 1700001G17Rik |
| Plxnb2 | Atxn10 | Inpp4a | Zfp563 |
| Pnp | Mrps17 | Psme3ip1 | Abca4 |
| Rbpms | Virma | Crebbp | Snora61 |
| Tmem223 | Psmd12 | Rnu12 | Homez |
| Rbbp7 | Acaa1a | Baiap3 | Vmn1r212 |
| Psmb10 | Inafm2 | 1700066M21Rik | Trib2 |
| Gna13 | Fos | Sox1ot | Ctbp1 |
| Zdhhc23 | Ebp | Gaa | Tceanc2 |
| Coro2a | Zfp839 | Fcna | Kif12 |
| Gstm7 | Bdkrb2 | Fpr1 | Olfr1495 |
| Nfe2l2 | Elfn2 | Lhx6 | Aldoc |
| Lamc2 | Rpe | Alkbh7 | Manbal |
| Qk | Ing1 | Msra | Ifi30 |
| Ccbe1 | Wdyhv1 | Cdh13 | Acot6 |
| Ptpn11 | Rhox6 | Nudt6 | Acaa1b |
| Hint3 | Pi4ka | Srpr | Gad2 |
| Eif1 | Rbmxl2 | Rasl10a | Itgb3 |
| Asah2 | Plekhg3 | Ikzf5 | Kcna1 |
| Selenof | Opn3 | Eif3g | Strbp |
| Glis3 | Ddx39b | Faf1 | Zfp42 |
| Dgkh | BC049688 | 4930474M22Rik | Tor1aip1 |
| Vegfb | Prpf38b | Strip1 | Dusp4 |
| Ndufb5 | St6galnac4 | Mir199b | Pdlim3 |
| Otud5 | Sh3bgrl3 | 1810062O18Rik | Mtor |
| Ncoa3 | Jph4 | Fbxo2 | Cep95 |
| Fus | Cox5a | Hlf | Srsf5 |
| Tsc22d1 | Ascl1 | Unc50 | Apela |
| Nt5c3 | Phrf1 | Fhad1 | Fbxl4 |
| Naxe | Aldh5a1 | Tdrd6 | Ogfod3 |
| Slc35f5 | Commd6 | Nup210 | Olfr594 |
| Eif6 | Dhtkd1 | Polr3c | Nxnl1 |
| Slc49a4 | Braf | Olfr1507 | D030025P21Rik |
| Mcl1 | Lbp | Pogk | Mcts2 |
| Dab2ip | Lilrb4b | Palld | Plpp4 |
| Abl2 | Tmem256 | Adamts10 | Aven |
| Rpf1 | H1f10 | Rreb1 | Ccdc78 |
| Edem2 | Metap2 | Gm35339 | Olfr508 |
| Tomm34 | Rilp | Dis3l | Olfr1029 |
| Btbd3 | Leo1 | Thy1 | Cln5 |
| Cenpx | Ythdc1 | Klf13 | Rilpl1 |
| Baiap2 | Cstf1 | Ocel1 | 3110070M22Rik |
| Sqstm1 | Wac | Emid1 | Fcrls |
| Rgs2 | Golm1 | Tbp | Stap2 |
| Unc119b | Copb1 | Sufu | 9330175E14Rik |
| Cep170b | Fmnl2 | Adamts5 | Samd10 |
| Myl6 | Pnkd | Lrrc45 | AY074887 |
| Add1 | Cox6a1 | Dnah17 | Fmc1 |
| Lpin2 | Ubxn7 | Hinfp | Creb3l2 |
| Extl3 | Sema4d | Prpf8 | Rps7 |
| Rnf4 | Cct3 | Suv39h2 | Chmp2b |
| Mrps14 | Ppig | Phb | Zfp971 |
| Nupr1 | S100a4 | Vmn1r224 | Psmd6 |
| Micos10 | Casc3 | Lox | Itpka |
| Ppic | Pagr1a | Uqcrc1 | Lgr6 |
| Klhdc10 | Fam126b | Klhl18 | Pole3 |
| H2bc4 | Fam193a | Sf1 | Slc22a6 |
| Zmynd8 | Nectin3 | Adnp2 | Smoc2 |
| Rnf31 | Tcf12 | Prima1 | Vmn1r225 |
| Hspb8 | Glrx | Txnrd3 | Snord57 |
| Ufl1 | Frs3 | P4htm | Stard9 |
| Tcea3 | Cep85l | Lamc3 | Mir694 |
| Ddit4 | Phldb3 | Rhobtb2 | Egln1 |
| Ugdh | Ube2v2 | Dlx4 | Olfr67 |
| Niban2 | Pomgnt1 | Olfr94 | Ybey |
| Reps1 | Cse1l | Pou3f1 | Chad |
| Rbm45 | Pkn2 | Pla2g12a | Ltc4s |
| Il1rn | Gabrq | Vamp7 | Snora16a |
| Ascc2 | Rabl2 | Armcx2 | Arsk |
| Cox7b | Aph1c | Fstl3 | Fam169b |
| Pak1ip1 | Rapgef6 | Garem2 | Foxn3 |
| Agtpbp1 | Fem1a | Glt28d2 | Bcl2l2 |
| Zranb2 | Tbl1xr1 | Pdpr | Dll3 |
| Bcar1 | Ccn1 | Hlcs | Asf1b |
| Tlnrd1 | Krt6b | Draxin | Ranbp2 |
| Pcgf6 | Tbl1x | Mylip | Exosc10 |
| Rab22a | Tbl2 | Gm525 | Gm839 |
| Clybl | Pex3 | Galnt7 | Krt1 |
| Plcg2 | Psmd1 | Ddx24 | Psme2 |
| Apaf1 | Ppp6r1 | Zfp235 | D630039A03Rik |
| Nipsnap3b | Fbxl15 | Ppil3 | Dcaf12l1 |
| Ttll4 | Zfp362 | Fam181b | Obp2a |
| Sptan1 | Cplane1 | Dhx58 | Mindy3 |
| Tex30 | Igkv2-137 | Coq8a | 1810030O07Rik |
| Lgalsl | Foxo1 | Gimap4 | Stox2 |
| Exosc3 | Ubash3b | Serpinb9 | Dnal4 |
| Pmpca | Gpc3 | Wdhd1 | Tmem120b |
| Trim25 | Dalrd3 | Pacsin1 | Slc7a6 |
| Mat2a | Rhbdd1 | Ttc17 | Acoxl |
| Snx6 | Fam81a | Arfrp1 | Tmem158 |
| Dexi | Atp6ap2 | Tspan10 | Fam136a |
| Sanbr | Thg1l | Vps26c | Plekhf1 |
| Hcfc1r1 | Hs1bp3 | Igbp1 | Neurog1 |
| Arl8b | Tgds | Usp9x | Fndc7 |
| Cln6 | 1700084E18Rik | Rbmx | Msantd3 |
| Selenos | Rdh11 | Hmgn2 | Slc27a4 |
| Cd53 | Polh | Adra1a | Olfr18 |
| Rhpn2 | Rragc | Nrp1 | Uqcc2 |
| Fabp5 | Hmx2 | A930018P22Rik | Opa1 |
| Aldh1a1 | B4galt4 | Chrna1 | Hand1 |
| Klhdc3 | Ppp1r14b | Rhbg | Smim6 |
| Nbr1 | Bhlhe41 | Synpo2l | Zcchc12 |
| Hif1an | Mtmr9 | Dhx33 | Ncam2 |
| Slc39a11 | Pla2g7 | Gvin3 | Klhl8 |
| Tubb2a | Dhps | Ppox | Cfhr1 |
| Frrs1 | Ss18 | Kifc3 | 1700049J03Rik |
| Esco1 | Col23a1 | 6430548M08Rik | Optn |
| Rad9a | Crot | Maf | Lysmd4 |
| Dym | Tars | Mapk11 | Mrm3 |
| Hat1 | Ssbp2 | Gpn3 | Atp6v0a2 |
| Plek | Nup205 | Plxna3 | Vmn2r14 |
| Sort1 | Esrp2 | Ctla4 | Iqcm |
| Etnk1 | Pigyl | Abcg2 | Ereg |
| Acsl1 | Surf4 | Ppm1j | Dvl3 |
| Ube2z | Leprot | Gpat4 | Acr |
| Ndufa13 | Galk2 | Ldhal6b | Ccdc186 |
| Arhgap21 | Cd81 | Mars2 | Tmem14a |
| Ssr1 | Gm7854 | Plgrkt | Amot |
| Eif4h | Tmem63b | Fam122a | Cuedc1 |
| Copz2 | Hmgcl | Vcpkmt | Nav2 |
| Pip4k2c | Trappc6a | Tbc1d10b | Ppp3ca |
| Idh2 | Tra2b | Nptx1 | Klhl3 |
| Myo10 | B3gnt7 | Tm6sf2 | Inca1 |
| Mthfd1 | Sall3 | Gm4792 | Wfdc11 |
| E2f4 | Sox6 | P2ry2 | Olfr131 |
| Armh3 | Lratd2 | Col8a2 | 9130008F23Rik |
| Ifi35 | Pou2f1 | Serinc4 | Trim44 |
| Slc10a5 | Thop1 | Nsrp1 | Fez1 |
| Ifi205 | H2az1 | Katnip | Olfr827 |
| Utp15 | Sohlh1 | Abce1 | Zfp316 |
| Sec14l2 | Prr7 | Rab1a | Mirlet7c-1 |
| Btbd10 | Arhgef37 | 2610005L07Rik | Tmem45a |
| Aqp12 | Mycn | Cdc6 | Pth1r |
| Dync1li1 | Ctss | Adra2c | Slc7a10 |
| Pros1 | Crnde | Ghsr | Nudt17 |
| Bmp7 | Inhba | Ptgfrn | Serpina4-ps1 |
| Apip | Actr2 | Csnk2a1 | Ybx2 |
| Rbbp8 | Bcas3 | Nphs1 | Syn3 |
| Atp5o | Hnrnpk | Wdr83os | Fam71f2 |
| Rsad2 | Dnase1l1 | Igsf9b | Gm10142 |
| Ube2d1 | Tet3 | Tmem125 | Pcyt2 |
| Inmt | Pls1 | Dctn3 | Klrd1 |
| Arc | D7Ertd443e | Hrct1 | Lef1 |
| Myl12a | Tra2a | Nr1d1 | Celf4 |
| Scamp2 | Engase | Upf2 | Lman2l |
| Pten | Tspan14 | Triap1 | Prokr2 |
| Eps8l2 | Avp | Ubap2 | Dusp2 |
| Rnf170 | Nectin1 | Kcnq5 | Klrb1c |
| Tmem64 | Npas2 | Osbpl11 | Piwil4 |
| Tmem184b | Ralgapa2 | Tti1 | Spertl |
| Prodh | Unc45a | Kcnh7 | Mrps27 |
| Ndufv2 | Top1mt | Nxf1 | Cyp2c68 |
| Klf10 | Mcidas | Kcnk7 | Alpl |
| Btg1 | Syde2 | Slc22a12 | Dennd4c |
| Ifi207 | Atxn2l | Mis12 | Efhd1 |
| Sec23b | Toe1 | Nhsl1 | Tmem25 |
| Mgat4a | Gstm4 | Gsx1 | 4930584F24Rik |
| Cxcl16 | Adra2a | Fam209 | Neurod1 |
| Ssr2 | Usp22 | Slc25a15 | AU015228 |
| Hnrnpa0 | Cab39l | Ttc36 | Tmem144 |
| Abi1 | Robo1 | Cyp2d37-ps | Olfr910 |
| Ndufb7 | Guf1 | Svep1 | Anks4b |
| Pdk4 | Olfr322 | Mir1a-1 | Ighv1-72 |
| Arsb | Pth2 | Sec24a | Ntn3 |
| Ppp2r1a | Fhl2 | Tldc2 | Scgb1c1 |
| Smg1 | Ubr7 | Zfr | Parvg |
| Cnnm2 | H3f3b | Otol1 | Zic5 |
| Coq10a | Kctd17 | N4bp2 | Mir540 |
| Arpc1b | Khdrbs1 | Plppr2 | Camsap1 |
| Zfp503 | Ncoa6 | Try4 | Aen |
| Slc18a1 | Ggps1 | Hykk | Msrb2 |
| Stxbp3 | Myo9a | Esrra | Zfp760 |
| Slc25a23 | Wfdc17 | Ccnd1 | Irf5 |
| Tpbg | Plcb3 | Gm5478 | Lyst |
| Acad11 | Ncoa4 | Cfap100 | Arhgap18 |
| Rdh10 | Mat1a | Wnt7b | Tlr6 |
| Bnip3 | Serinc5 | Ildr1 | Primpol |
| Gbf1 | Trappc8 | Zfand2b | Cyb5d2 |
| S100a10 | Ralgapb | Il17rd | Agt |
| Ndufc1 | Lrrc14 | Eif2b4 | Olfr342 |
| Aldh1l1 | BC004004 | Kcnk2 | Tbx20 |
| Tardbp | Crls1 | Rdh16f2 | Nlgn1 |
| Myadm | Nyx | Espl1 | Ephx2 |
| Lrp4 | Sdhd | Pou3f3 | Lrrcc1 |
| Sdcbp | Golga2 | Trmt12 | Tmem213 |
| Sprr1a | Commd2 | Gm14164 | Pmf1 |
| Slc31a1 | Ctdnep1 | Gins2 | Il17d |
| Niban1 | Ttr | Rasal1 | Snora7a |
| Cldn12 | Tm4sf4 | Spag8 | Btd |
| Rbm47 | Ifi209 | Nmur2 | Lipt1 |
| Slc26a9 | Cd47 | Med12l | Serinc2 |
| Clk3 | Usp47 | Lynx1 | Olfr692 |
| Prkab1 | Cdk17 | Xiap | Tuba3a |
| Hyou1 | Tnfaip8 | Rab37 | Cpne4 |
| Snx1 | Tulp1 | Kat2b | Pdk2 |
| 5031439G07Rik | Bphl | Plk1 | Trip6 |
| Kctd9 | Fh1 | Igfbp3 | Nkx6-3 |
| Tuft1 | Smarcb1 | Tifa | Olfr145 |
| Ms4a6c | Orc4 | Gba | Mrpl58 |
| Plod3 | Cep97 | Frk | Dbil5 |
| Tmem160 | Zc3h12b | Tyw5 | Mmp17 |
| Wdr43 | Nfic | Mvd | Stx2 |
| Snord14e | Pkn3 | Atr | Olfr1120 |
| Pwp1 | Nr2c2 | Aldh16a1 | Tbata |
| Nckap1 | Gdnf | Pex2 | Prdx6-ps2 |
| Gid4 | Rnf185 | Dync2i2 | F2r |
| Sord | Dbr1 | Tmem204 | Prss22 |
| Apmap | Dnaja1 | Crygb | Hnrnpll |
| Etf1 | Aatk | Lingo1 | Cdk2ap1 |
| Crtc3 | Rcn1 | Mapkbp1 | S100a7a |
| Nup50 | Wbp4 | Mrpl34 | Jag1 |
| Csnk1e | Rapgef5 | Mospd4 | Tusc3 |
| Anxa7 | Haus6 | Mtss2 | Nkx2-2 |
| Eif5 | Plekhm3 | Zc3h6 | Mrps10 |
| Fam234b | Mir667 | B3galnt1 | Ntn5 |
| Ifngr2 | Fstl1 | Jph2 | Tulp3 |
| Scd2 | Dgat2 | Gm12298 | Zkscan7 |
| Slc38a1 | Mir668 | Uqcc3 | Cxcr1 |
| Wapl | Capn1 | Senp2 | Mettl18 |
| Lamc1 | Nr5a1 | Rasd1 | H2-M5 |
| Tpd52l2 | Fbxl5 | Rfesd | Olfr243 |
| Rap1gap | Gfod2 | Cpne8 | Mir200a |
| Cdc42se2 | Slc31a2 | Zfp296 | Olfr1320 |
| Commd3 | Phlda3 | Abcc6 | Ryr3 |
| Ets1 | Aqp2 | Rbm26 | Gm1976 |
| Eef1e1 | Uqcrq | Lman1l | Slamf7 |
| Rhog | Mrpl4 | Gm16223 | Pea15b-ps |
| Kyat1 | Rbm25 | Shd | Adgrg2 |
| Rgs11 | Galk1 | Chrnb1 | Itgb8 |
| Met | Rnf125 | Ccar1 | Awat1 |
| Fam210b | Pdp2 | Dgka | Gm9920 |
| Med31 | Zfp592 | Ostm1 | Trim32 |
| Txnrd1 | Fam214a | Lyrm1 | Gm5922 |
| Comt | F930017D23Rik | Sptbn4 | Olfr774 |
| Gss | Hace1 | Syngr4 | Vwa5b2 |
| Otud4 | Cog1 | Hint2 | Slc5a4b |
| Atp5j | 5930403N24Rik | Wtap | Ssbp1 |
| Abtb2 | Akap1 | Ncan | Pgk2 |
| Fam107b | Cdh5 | D730005E14Rik | Zfp92 |
| Git1 | Pcx | Mir99a | Zfp277 |
| Tnpo3 | Mta3 | Adamtsl3 | Nup107 |
| Hipk2 | Usp28 | Usp31 | Leng8 |
| Mcm6 | Snx21 | Stxbp1 | Zfp41 |
| Pdpn | Spg21 | Ccdc182 | Qrfpr |
| Fxyd6 | Ltbp3 | Dcaf10 | Il34 |
| Igf1 | Rbm34 | Ror1 | Hoxc13 |
| Dcaf13 | Fam117b | Kank2 | Pou4f3 |
| Kctd3 | Sctr | Cyp2e1 | Odf2l |
| Chchd3 | Pbx3 | Chmp4c | Arfip1 |
| Fhl3 | Tmem150a | Nid2 | Nek5 |
| Tmem87b | Mecr | Pank2 | Gckr |
| Smim14 | Galnt1 | Trpv5 | Tdrd5 |
| Edem1 | Rnf212 | Stag1 | Olfr894 |
| Jade1 | Ankrd17 | Mmp7 | Xirp1 |
| 2310061I04Rik | Pde4a | Fam111a | Il17c |
| Tmem184a | Alx4 | 3110021A11Rik | Krt9 |
| Clu | 2210016F16Rik | Chordc1 | Smap1 |
| Atp5k | Slc30a7 | Ifi27l2a | Papolg |
| Gak | Cnpy3 | Irf7 | Unc93b1 |
| Sdc4 | Ankrd34b | Ift88 | Tmem243 |
| Sypl | Epm2aip1 | F9 | Arhgap15 |
| Fbxo9 | Bclaf3 | Zfp974 | Slc27a6 |
| Kctd10 | Mir375 | Olfr642 | Neurod6 |
| Suclg1 | Adam8 | Usp15 | Ubqln3 |
| Herpud1 | Zfand6 | Rad50 | Tmod1 |
| Llgl1 | Zfp213 | Rps25 | Trmt6 |
| Sub1 | Man2b2 | Gxylt1 | Fer1l4 |
| Itpripl2 | Brf2 | Psma4 | Clasrp |
| Elovl1 | Dubr | Fam76b | S1pr2 |
| Ice1 | Syt8 | Trappc4 | Aoc2 |
| B4galt1 | Efna4 | Polr2j | Stat2 |
| Naa60 | Rce1 | Ttc14 | Cdk5r1 |
| Hax1 | Prkacb | Cspg4b | Cpsf4l |
| Med21 | Arl14ep | Gkn3 | Zmiz2 |
| Grcc10 | Itpa | Slc25a14 | Rasgrf1 |
| Ttc9 | Tulp4 | Zfp799 | Olfr90 |
| Ciao1 | Sgcb | Pex1 | Leng9 |
| Pknox1 | Gm41515 | Cyth4 | Zadh2 |
| Eid3 | Gatad2b | Nhlrc3 | Sh2b1 |
| Lims1 | Ric8b | Prss27 | Olfr568 |
| Ralb | Mrps2 | Cwc27 | R3hcc1 |
| Med10 | Crybg2 | Olfr417 | Kcnh6 |
| Sdc1 | Nr4a1 | Dbnl | Gm42368 |
| Eif2b1 | Rbm7 | Col27a1 | Fam189b |
| Sult1c2 | 5730455P16Rik | Atmin | Olfr263 |
| Anxa11 | Nars2 | Mtrfr | Gm8479 |
| Abcd3 | Fgf8 | Lct | Chst1 |
| Glt1d1 | Arhgap27 | Sgpp2 | Fmr1 |
| Tln1 | Plekhb2 | Zfyve27 | Tmem107 |
| Slc1a5 | Tmem116 | Vwce | Smndc1 |
| Hp1bp3 | Mtch1 | AI504432 | Cherp |
| Ctnnd1 | Hip1r | Gp5 | 2310002L09Rik |
| Fry | Zdhhc12 | Arhgef3 | Olfr1474 |
| Lilrb4a | Taf2 | Gm34335 | Egfl7 |
| Ttc39a | Tcf7l2 | 5730507C01Rik | Pld3 |
| Lrrfip1 | Tmem220 | Ogn | Kcp |
| Ddx50 | Thbd | Tubgcp6 | Tbc1d31 |
| Zfp317 | Ptges3 | Ripply3 | Abhd8 |
| Tmem11 | Traf3ip2 | Polr1c | Mir190b |
| Gpd2 | Uck2 | Defb19 | P3h4 |
| Hdac11 | Slc25a13 | 4930451I11Rik | Sult4a1 |
| Ostc | Cyrib | Clns1a | Pdzd8 |
| Mvp | Utp18 | Zcchc9 | Cdc37l1 |
| Itsn2 | Tmem94 | Syp | St6gal2 |
| Nars | Luc7l3 | Olfr917 | Arhgef10l |
| Gpr39 | Coq10b | Mgst3 | Lrp5 |
| Smyd5 | Rasl10b | Plag1 | Fam83d |
| Zfp948 | Rhbdf1 | Clec5a | Sowahc |
| Foxp4 | Gfus | Polr2m | Enoph1 |
| Utp4 | Irf1 | Gm32479 | Pank4 |
| Sema3c | Atp2b2 | Stau1 | Zc3h10 |
| Itm2b | Pign | Ccdc51 | Aph1a |
| Nucb1 | Mob2 | Vwf | Ly6i |
| Mrs2 | Rnf213 | Tmem8b | Fer1l5 |
| Kif21a | Cnn2 | Prkag3 | Angptl8 |
| Esyt2 | Ggcx | Eif4enif1 | Fmnl3 |
| Urb1 | Cdkn2aip | Wdr61 | Glrb |
| Ktn1 | Chchd4 | Wfdc3 | Stk17b |
| Ppp2r2a | Pde7a | Elmod2 | Stn1 |
| Srsf6 | Ube2f | Pirt | Cenpv |
| Cpn1 | Pxmp2 | Kdf1 | Dctn5 |
| Hsd17b13 | Gemin5 | Hnrnpc | Col25a1 |
| Myo1e | Abca6 | Hsd11b2 | Ykt6 |
| Dync1i2 | Cdc14b | Slc37a4 | Glmp |
| Ms4a6d | Hook3 | Loxl4 | Trim67 |
| Tmem65 | Ifih1 | Agfg2 | Ccdc117 |
| Gas1 | Bcam | Rubcn | Kcng1 |
| Iqgap2 | Fancf | Bbs7 | Map3k10 |
| Spp1 | Mcf2l | Cd52 | Zfp874b |
| Ftsj3 | Wdr13 | Saraf | Wnk3 |
| Gm10190 | Gca | Clcn4 | Mark4 |
| Etfrf1 | Clcc1 | Trmt1l | Prf1 |
| Bzw1 | Arhgap12 | Nkx3-2 | T |
| Cnot11 | Aamdc | Sall4 | Ppp2r5b |
| Higd2a | Ube2j1 | Cct2 | Xpnpep3 |
| Rnf103 | Armc1 | Efemp1 | 1810024B03Rik |
| Tnk1 | Habp2 | Dhx36 | Zfp780b |
| Phlda1 | Casp4 | Lpcat3 | Eml3 |
| Pcdh1 | Galr1 | Thrsp | Cr1l |
| Serinc3 | Chst8 | Tmed7 | Nr2e1 |
| Alcam | Alg3 | Cdk14 | Rit2 |
| Zfyve21 | Eif2b5 | Glod4 | Gm12474 |
| Wwox | Prss53 | Klk7 | Chrnb4 |
| Tfdp2 | Spata6 | Vmn1r208 | Zfp1 |
| Ufc1 | Fam220a | Mup3 | Lix1 |
| Norad | Ywhae | Tatdn1 | Gtf2h5 |
| Nr3c1 | Ppargc1a | Wdr4 | Foxi3 |
| Acsl5 | Sgms1 | Hsdl2 | Cpa5 |
| Gas2l1 | C1ql1 | Sh2d7 | Alox12b |
| Slc4a11 | Magel2 | Arpin | Mus81 |
| Metap1 | Eif3k | Paxip1 | Btnl2 |
| Gpcpd1 | Ddx42 | Usp18 | Atg7 |
| Med6 | Gpr62 | Krtap5-1 | Oma1 |
| Riox2 | Pipox | Anp32-ps | Nacc2 |
| Trpt1 | Zfp623 | Ccdc149 | 4632404H12Rik |
| Shmt2 | Map1s | Atp6v0e | Dnaaf3 |
| Hsd17b10 | Preb | Tmem260 | Sec23a |
| Nr5a2 | Pgls | Rtp1 | Nmnat1 |
| Mir216a | Lin52 | Trerf1 | Fzd5 |
| Nek7 | Ang2 | Mir124a-2 | Tmem216 |
| Mfsd2a | Arsa | Odc1 | Zfp609 |
| Elavl1 | Dtd1 | Trap1 | B3galt4 |
| Tmed2 | Sf3a1 | Tac4 | Zfp536 |
| Dnm1l | Setd6 | Whamm | Pgam5 |
| Dixdc1 | Gm4532 | Lcn15 | Mrps23 |
| Pacsin2 | Rnft1 | Cmpk2 | Serpina1d |
| Cab39 | Sf3b6 | Mir150 | Clec2d |
| Xpo1 | Thyn1 | Fbxo41 | Dgkq |
| B4galt5 | Abcf2 | Klk1b22 | Rab18 |
| Dctpp1 | Kctd14 | Atp5d | Olfr1014 |
| Scyl2 | Mien1 | Wdr45b | Fscn1 |
| Vezt | Tent4a | Cdipt | Ift27 |
| Tnks1bp1 | Acd | Zscan2 | 4930562C15Rik |
| Frg1 | Pik3c2g | Uchl5 | Snrnp35 |
| Uqcr11 | Samsn1 | Gsc | Drc7 |
| Umps | C2cd4c | Prr30 | Tmem254 |
| Angpt1 | Yipf1 | Tmem41b | Sulf2 |
| Rex1bd | Col4a4 | Mgl2 | Gm10258 |
| Bsg | Sdhaf2 | 1700003F12Rik | Magea6 |
| Ppa1 | Smurf2 | Bcat1 | Mxra7 |
| Cct4 | Strap | Ccdc30 | Ankrd61 |
| Psmc6 | Tmem126b | Riok1 | Aaas |
| Fchsd2 | Exosc2 | Polr2e | Frrs1l |
| Slc16a7 | Eml6 | Tshz3 | Calml4 |
| Atrn | Nckap1l | Clip1 | Slc25a18 |
| Crebl2 | Zbtb7c | Hpf1 | Pcsk7 |
| Sdhc | Cox4i1 | Ttc41 | H2bu2 |
| Crybg3 | Barx1 | Med1 | Rpl5 |
| Coa3 | Aire | Ddx27 | Ddhd1 |
| Atp1a1 | Swt1 | Col9a3 | Zpld2 |
| Gnb1 | Il33 | Camk1 | Mal |
| 1110032A03Rik | Psmd4 | Odad1 | Fbxo36 |
| Rsbn1 | G2e3 | Mis18a | Amdhd1 |
| Cdc42bpb | Zfp217 | Eef1a2 | Mettl1 |
| Ube4a | Sesn3 | Nt5m | Usp5 |
| Eif3c | Klk14 | Mfsd4b1 | Fam221b |
| Sltm | Gfm2 | Zbtb21 | Ckmt2 |
| Reep3 | Oxa1l | Cdpf1 | Prss54 |
| Slc19a1 | Tgfbr2 | Farsa | 4930505A04Rik |
| Ric1 | Dus4l | H1f9 | Klra2 |
| Gcdh | Olfr1347 | Akap9 | Pdzd3 |
| Thrb | Hoxb3 | Timmdc1 | Me2 |
| Arhgdia | Wnt5b | Adamts14 | Ago4 |
| Tacc2 | Chic2 | Creb3l3 | Foxl2os |
| Maged1 | S100a16 | Pdgfb | Semp2l2b |
| Cstb | Ston2 | Lig4 | Ccdc13 |
| Tmem87a | Tmem253 | Nod1 | Rad51 |
| Srp9 | Bpgm | Mcpt1 | Mprip |
| Chmp4b | Mrpl12 | Mgrn1 | Rfc2 |
| Mmachc | Syt3 | Sall2 | Wdr53 |
| Sntb1 | Prr36 | Agmat | 2900026A02Rik |
| Selenom | Hadhb | Elavl3 | Tcim |
| Cox6c | Mzt2 | Atp11c | Taf6 |
| 1700008J07Rik | B3gnt6 | Spatc1 | Kdm8 |
| Fkbp1a | Pdyn | Pnliprp2 | Plk3 |
| Wsb2 | Gskip | Ddx19b | Gal3st2c |
| Ces1e | Togaram1 | Zfp991 | Olfr70 |
| Wbp1 | Fnta | Rpl27a | Igdcc3 |
| Ap2b1 | Lnpep | Map3k13 | Vmn1r229 |
| Rc3h1 | Slc35a5 | Myo15b | Ppp2r2c |
| Btaf1 | Bysl | Togaram2 | Syne3 |
| Ndst1 | Oxt | Mosmo | Defb35 |
| B3galnt2 | Gng10 | Tspan11 | Gm10741 |
| Pfn1 | Tsc2 | Crispld2 | Nudcd3 |
| Rab12 | Chd4 | Gramd1a | Noxa1 |
| Tbc1d8b | Stard10 | Gimap9 | Igfbp4 |
| Mir19a | Tbc1d24 | Tox | Dcpp1 |
| Uba5 | Lingo4 | Setd1a | Spry4 |
| Klc1 | Kcnt1 | Ffar3 | Hsd3b3 |
| Anapc13 | Lrrc75a | Arf3 | Cramp1 |
| Stam | Dlk1 | Ctla2a | Tsks |
| Rrp1b | Vrk2 | Mios | Ppm1b |
| Prxl2c | Gpr179 | Mxd3 | Duox2 |
| Dnmt3a | Cnnm4 | Tmem229b | Zfp105 |
| Sos1 | Snord42b | Stox1 | Vmn1r72 |
| Ly6e | Zfp652 | Tmem52b | Olfr1413 |
| Supt16 | Dnajc4 | Nkiras2 | Chit1 |
| Ndufa4 | Chd1 | Slc6a14 | Rnase12 |
| Vdac3 | Ttll9 | Kirrel3 | Saxo2 |
| Grwd1 | Rwdd4a | Tmem167 | Gm1141 |
| Msi2 | Mrpl2 | Hic2 | Mlxipl |
| Sec16a | Akap8l | Fastkd3 | Samd8 |
| Fmn1 | A930011G23Rik | Septin8 | Ptgdr2 |
| Ptpn9 | Zdhhc3 | Slc9a7 | Kncn |
| Noc4l | Mir598 | Armc10 | Tex19.2 |
| Egf | Sema4b | Lrit1 | Nck1 |
| Nudcd2 | Ammecr1l | 1700029I15Rik | 1700020N01Rik |
| Shoc2 | Lpo | Trub1 | Zfp846 |
| Atoh7 | Dctn6 | Nr4a3 | Nt5c |
| Kcng2 | Ltbr | Col9a1 | Cmtm4 |
| Aldh2 | F3 | Slc4a9 | Snord87 |
| Kdm1b | Pigz | Gm14092 | Slc15a2 |
| Psmd7 | Rad51d | Frem2 | Psg27 |
| Tmed3 | Pcgf5 | Snd1 | Zfp53 |
| 4933434E20Rik | Tbc1d14 | Igflr1 | Aptx |
| Sil1 | Slc2a2 | Sdhaf3 | Lgi1 |
| Dusp5 | Cybb | Mlst8 | Keap1 |
| Plpp1 | 3110082I17Rik | Cables1 | BC038268 |
| Ubr3 | Abhd3 | Ercc5 | Sirt5 |
| Ednrb | Naf1 | Ccdc107 | Casc1 |
| Fmo2 | Rbm41 | Adora2b | Micos13 |
| Hmgcs1 | Kcnk5 | Maneal | Ciz1 |
| Arcn1 | Klf5 | 5730409K12Rik | Golph3 |
| Hoxa4 | Shb | Caly | Tead3 |
| Nr0b2 | Tmem161a | Wbp11 | Cep131 |
| Wasf2 | Rps6kl1 | Tnc | Spns1 |
| Psenen | Ccnt2 | Lrp3 | Sox2 |
| Fam185a | Dcun1d2 | Tedc1 | Tnfrsf11b |
| Mpc1 | Slc35b4 | Prss8 | Osbpl10 |
| Tomm6 | Cyld | Slc27a5 | Enkd1 |
| Fam149a | Pou4f2 | Arhgdib | Epas1 |
| Ddb1 | Smarcc2 | Sh3rf2 | Cdc25c |
| Macrod1 | Acss3 | D030056L22Rik | Enox1 |
| Park7 | Cisd2 | Tsfm | Csta2 |
| Cog7 | Plcl2 | Bicdl2 | Kdm7a |
| Ppp1r13b | Klhl24 | Plekha8 | Rpl9 |
| Mecom | Snord55 | Gstm6 | 4930548G14Rik |
| Irak3 | Caprin2 | Acat2 | Guca2b |
| Etfb | Slc7a6os | Myh11 | Mars1 |
| Rsl24d1 | Zfp110 | Cd302 | Gabarapl2 |
| Pde3b | Eml4 | Haus4 | Itga2b |
| Numb | Zfp9 | Ewsr1 | Atp6v0d2 |
| Naa25 | Crtap | Zfp790 | Chrm4 |
| Erp27 | Sdr39u1 | Fancc | Zfp61 |
| Pon3 | Pygb | Alg8 | St3gal1 |
| Gorasp2 | Ak1 | Mtx1 | Zfp84 |
| Lztr1 | Gm5532 | Lamtor4 | BC085271 |
| Tm2d2 | Erbb2 | Gria3 | Aoc1l1 |
| Ccdc167 | Zfp174 | Ndc80 | Synb |
| Dapp1 | Elf2 | Map6d1 | Ptpre |
| Kcnd3os | Gtf2b | Dlx5 | Apol7a |
| Psen2 | Ephx1 | B3gnt8 | Shc1 |
| BC031181 | Gpr63 | Olfr315 | Olfr1505 |
| Dnttip2 | Edf1 | Rnf112 | Fbxo5 |
| Tec | Zfp654 | Mypn | Api5 |
| Rida | G630025P09Rik | Zswim8 | Wasf3 |
| Thrap3 | Mir181d | Gstm5 | Zfp422 |
| Atp5j2 | Nf2 | Pigt | Mnat1 |
| Mtss1 | Cox6b1 | Dcp2 | Zfp78 |
| Mtpn | Zbtb1 | Men1 | Phc3 |
| Ubac2 | A930016O22Rik | Gm6377 | Zcchc14 |
| Srpk1 | Tmco1 | Cox14 | Gm12511 |
| Mvb12a | Rnd1 | Tug1 | Prss28 |
| Echdc2 | Sypl2 | 3830406C13Rik | Snord16a |
| Slc25a39 | Spin1 | Pou4f1 | Gm826 |
| Xpo6 | Otub1 | Gfra1 | Zfp319 |
| Tuba1a | Pm20d2 | Anxa1 | AA986860 |
| Klhl21 | Arpp19 | Crispld1 | Ly6k |
| Raph1 | Lrrc8c | Zfp236 | Gm16287 |
| Yipf4 | Tfam | Hscb | Agap2 |
| Cask | Arhgef28 | Gps2 | Vmn2r112 |
| Ndufs8 | Rimkla | Ppa2 | Myo3a |
| Vps25 | Ndufab1 | Rwdd1 | Slc38a2 |
| Spint1 | Tmem215 | Glra2 | Lrat |
| Kxd1 | Oasl2 | Hpca | Cep57l1 |
| Mir615 | Gpd1l | F8a | Sftpb |
| Ethe1 | Gpt | Ppie | Acp7 |
| Lap3 | Psat1 | Dtd2 | Meig1 |
| Susd2 | Mir139 | H2-Q10 | Krtap4-6 |
| Foxj3 | Il3ra | Hddc3 | Acly |
| Erp44 | Wdr75 | Zmynd11 | Ube2v1 |
| Sigmar1 | Pak6 | Haus7 | Thap3 |
| Ctdp1 | Ssc4d | Mrpl45 | Atp6v1g1 |
| Nln | 4921533I20Rik | Riok2 | Stx1b |
| Rnf217 | Ppp1r3e | Ccdc17 | Nefh |
| Nup98 | Calu | Prdm11 | Actrt2 |
| Nup54 | Scfd1 | Mrpl49 | Zfp341 |
| Itga2 | Calcoco1 | Pibf1 | Ccdc171 |
| Spred1 | Phpt1 | Slf2 | Gle1 |
| Ndufs3 | Fn3k | Klk1b3 | Dph6 |
| Dcxr | Tor1aip2 | Birc5 | Slc4a7 |
| Cd320 | Ikbkb | Sec31b | Mamdc2 |
| Cox20 | Poli | Zfp398 | H1f3 |
| Carm1 | Bbs9 | Rpl7l1 | Ccdc32 |
| Mier3 | Celf6 | Sp7 | Mog |
| Wdr5 | Lrrc18 | Crhr2 | Gpr83 |
| Naa20 | Bag1 | Nat10 | Lmntd2 |
| Emp2 | Rmc1 | Ldhb | Zfp229 |
| Slc35g2 | Txnip | Tpcn1 | 5830454E08Rik |
| Nipsnap2 | Zdhhc5 | 1700122O11Rik | Il6 |
| Ufsp2 | Ankle2 | Klhdc7a | Spaca5 |
| Hpn | Fam83f | Ptges3l | Zbtb32 |
| Cmtm6 | Ttc39c | Olfr132 | Cux1 |
| Sphk1 | Pdcd11 | Bcl2 | Jdp2 |
| Pno1 | Camta2 | Fads2 | Arvcf |
| Slc44a3 | C1qtnf4 | Rcc1l | Xkr6 |
| Chmp1b | Slc5a3 | Phf1 | Lrit2 |
| Egr1 | Cryz | Slc45a2 | Rimbp3 |
| Plscr1 | Mrpl50 | Thtpa | Prl3d3 |
| Rab11fip3 | Zfp523 | Aplf | 2810021J22Rik |
| Pex7 | Hgh1 | Zfp819 | Dnaaf8 |
| Svip | Ift81 | Tceal1 | Dnajb13 |
| Ndufs1 | Bak1 | Fcgr2b | Trmo |
| Osbpl9 | Grm2 | Llgl2 | Kansl1l |
| Pdp1 | Nenf | Kctd8 | Myod1 |
| Med15 | 9330020H09Rik | Xaf1 | Ipp |
| Angptl4 | Macir | Tmem60 | Olfr368 |
| Mapkapk5 | Gpsm1 | Siae | Tasl |
| Ccdc88a | Tbcd | Snx30 | Sprr2b |
| Plk2 | Gadd45a | Aimp2 | Skor1 |
| Cox8a | Kdm5a | Bhlha9 | Pgam1 |
| Zfp664 | Nol3 | Fbln2 | Plekha6 |
| Foxl2 | Mlycd | Sde2 | Wdr17 |
| Eif3b | Trappc2l | Fitm2 | Fchsd1 |
| Wdsub1 | Tgfbi | 0610039K10Rik | Prpf4b |
| Nup93 | Dgkd | Creld1 | Fbln7 |
| Nudt19 | 1700018A04Rik | Ttf2 | Itgb7 |
| Ndufa3 | Lpp | Hhatl | Glb1l2 |
| Lsm14b | Tm2d1 | Map2 | Lgals7 |
| Gjd3 | Timm17a | Raf1 | Opa3 |
| Glg1 | Cmc2 | Slc8a2 | Zbtb33 |
| Afdn | Phxr1 | Ap5z1 | Hrg |
| Cib2 | Rnase1 | Slc39a13 | Zbtb49 |
| Zfp771 | Ap1m2 | Tlcd5 | Mybphl |
| Bmp3 | Pdxk | Stub1 | Kcnn3 |
| Serpine1 | Smagp | Rsph6a | Reep2 |
| Tdrd7 | Pik3r2 | Naa40 | Ccdc80 |
| Ehd1 | Adam34l | Orc5 | Atp5g3 |
| Tbc1d12 | Fhit | Ninj1 | Pias4 |
| Jmjd8 | Tmem132a | Olfm2 | Dnajb3 |
| Rbbp9 | Wwp2 | Dcaf15 | AI597479 |
| Tgfbr1 | Tns3 | Mfsd4b2 | Xcl1 |
| Sh3bgrl | Gng12 | Tmem229a | Aif1 |
| Erf | Bms1 | Il12rb1 | A930017M01Rik |
| Rfk | Dlst | Amer3 | Rasgrf2 |
| Lypla1 | Pgpep1 | Scyl1 | Npr3 |
| Ssh3 | Mbd2 | Mbp | Oit3 |
| Ddr1 | Mirlet7f-1 | Adra1d | Nrbf2 |
| Lamtor2 | Gm13498 | Ppp1r13l | Tfdp1 |
| Igfbp5 | Pkd2l2 | Cyp11b2 | Mir690 |
| Ncdn | Rpn2 | Dennd4a | Dleu2 |
| Ppl | Msl3 | Osr1 | Gxylt2 |
| Slc25a30 | Lhfpl2 | Cep57 | Hoxc8 |
| Map1lc3a | Plekhh3 | Icam4 | Kctd6 |
| Hapln4 | Sytl1 | Slc27a3 | Tmem159 |
| Lonrf3 | Snx8 | Tulp2 | Ssu2 |
| Camsap2 | Ms4a6b | Gatad1 | Olfr1032 |
| Ptbp1 | Trim30d | Dmrtb1 | Lpar3 |
| Gpd1 | Pdcl3 | Emp3 | Slc26a5 |
| Cisd1 | Mettl6 | Psmc1 | Efcab2 |
| Pak2 | Klc4 | Sec11a | Cage1 |
| Plekhm2 | Mdk | Ofd1 | Cenpl |
| Mpv17l2 | Card10 | Mir1839 | Gtf3c1 |
| Pafah1b2 | Fcrlb | Slc17a7 | Olfr1 |
| Arhgap5 | Echdc3 | Epn3 | 8030474K03Rik |
| Fam98a | Faap20 | Hesx1 | Krtap4-2 |
| Sqle | Pcyox1l | Sntb2 | Angpt4 |
| Gdf10 | Spesp1 | Col5a1 | Rpp40 |
| Mir19b-1 | Thoc6 | Hps3 | Gm15417 |
| Fam135a | Hk2 | Psmb6 | Ankrd26 |
| Mta2 | Mpc2 | Krcc1 | Slc11a1 |
| Slc39a1 | Nudt16l1 | Wfdc15a | Nemp2 |
| Ssu72 | Phtf1 | Tmem74b | Bclaf1 |
| Huwe1 | Mfn2 | Foxl3 | Pxt1 |
| Ncl | Rbm17 | Atp13a3 | Gm10037 |
| Gtpbp2 | Gm10272 | Lars2 | Bin3 |
| Pgap6 | Erbin | Vezf1 | Capn9 |
| Rmdn3 | Cyyr1 | Vps29 | Gm9991 |
| Fuca2 | Fcf1 | Dcun1d4 | Esrrg |
| Utrn | Phactr4 | Erich4 | Pxdn |
| Cracdl | Snrnp48 | Ubp1 | Prdm1 |
| Larp1b | Cacul1 | P2rx3 | Carf |
| Cbs | 5031425E22Rik | Lin7c | Gm5475 |
| Smarca2 | Gprin3 | Srgap1 | Abcb11 |
| Nat8 | Zfp697 | Zfyve28 | Vps33a |
| Mpzl3 | Sft2d3 | Bri3bp | Samt2b |
| Pard3 | Copg1 | Kank1 | Trav13d-4 |
| Mapk9 | Snx15 | Wipf2 | Btn1a1 |
| Lcorl | Ptov1 | Csf3 | Iqsec3 |
| Psmd11 | Tshz2 | Spsb1 | Dpysl4 |
| Fndc3b | Usp10 | Cebpzos | Olfr1414 |
| Adsl | Ngdn | Aspg | Zfp189 |
| Capzb | Med13l | Adad2 | Incenp |
| Polr3e | Tbx1 | Pdap1 | Letm1 |
| Eif4ebp2 | Kmt2a | Fam181a | Fgf20 |
| Ist1 | Psma1 | Mmp14 | Col6a1 |
| Npepps | Osr2 | Fcgr4 | Gprc5d |
| 4931406C07Rik | Rai1 | Ttc30b | Pmel |
| Nup43 | Mterf4 | Crebzf | 9130401M01Rik |
| Dock5 | Zfp451 | Tafa5 | Agxt2 |
| Eid1 | Trim27 | Klhl12 | Gm6034 |
| Tfe3 | Pomp | Gripap1 | Clec1b |
| Ctsc | Uqcr10 | Fermt3 | C2cd5 |
| Azin1 | Lrrc20 | Kazald1 | Rax |
| Trmt2b | Mpzl2 | Aoc1l3 | Gucy1a2 |
| Hmgxb3 | Rusc1 | Fam71e1 | Scarb2 |
| Cpox | Ncbp1 | Gabpb2 | Ythdf2 |
| Gtf2f2 | Nxt1 | Kcnh2 | Oxtr |
| Arl3 | Ddt | Zfp264 | Eif4e1b |
| Mcub | Clpp | Ipo13 | Xkr9 |
| Pkp3 | Sdha | Zdhhc2 | Taco1 |
| Dynll1 | Dupd1 | Arhgef12 | Adam30 |
| Cds2 | Tmem14c | Zbtb6 | Siah1a |
| Kmt2c | Hmbs | Wdr54 | Sp3os |
| Rnf2 | Pdxdc1 | Tmem26 | Fam71d |
| Terf1 | 9430015G10Rik | Ctf1 | Ano7 |
| Acot13 | Qprt | Lrrc10 | Krtap4-7 |
| Itgb5 | Selenoo | Pja2 | Muc13 |
| Dusp26 | Tfcp2 | Slc6a5 | Daxx |
| Tspan3 | Kbtbd2 | Tbrg4 | Piezo2 |
| Tusc1 | Mfap3 | Ncstn | F12 |
| Tmem128 | Cdk12 | Stk16 | Bcan |
| Fcer1g | Nek9 | Sod1 | Gata4 |
| Snrpa1 | Setd5 | Gnl3l | Nckipsd |
| Tmem35b | Nup62cl | Akt1s1 | Neurog2 |
| Camk1d | Bcl11a | Nsa2 | Rpusd3 |
| Tgm2 | Grem1 | Lss | Gm10804 |
| Rcan2 | Upp1 | Ptpra | Six2 |
| Fam13b | Gfpt2 | Mir378a | Nlk |
| Arv1 | Nxph3 | Msgn1 | Rpl29 |
| 1700019D03Rik | Sh2d5 | Utp25 | Frmd3 |
| Atf4 | Dennd1a | Steap4 | Grik3 |
| Itgb4 | Vps4b | Pbdc1 | Sema3b |
| Adprm | Fhip2b | Gm5129 | Kcnj16 |
| Apool | Rps6kc1 | Cryba2 | Hjv |
| Mettl2 | Cxxc4 | Marf1 | Mrps36 |
| Mapk7 | Akt1 | Sox30 | Top3b |
| Tprgl | Ndc1 | AU022252 | Agtr2 |
| Emx1 | Dtnbp1 | Usp26 | Prg4 |
| Uchl3 | Atrnl1 | Pold2 | Sumf2 |
| Cdr2 | Man1b1 | Tube1 | Zic1 |
| Jun | Slc6a8 | Psma7 | Mir34a |
| Slc38a5 | Nrg2 | Bmpr1b | Slc6a3 |
| Selenoi | Bola1 | B3gnt4 | Pcdhb19 |
| Dip2c | Ptrh1 | Ate1 | Gcsam |
| Wdr77 | Smdt1 | Hcn2 | Sgo2b |
| Ssh1 | Ppt2 | Ssrp1 | 1700031F10Rik |
| Adh1 | Gbx1 | Tlx1 | Ccndbp1 |
| Pum3 | Trp53rka | Olfr235 | Ifi213 |
| Ybx3 | Mir497 | Klf1 | Rilpl2 |
| Znhit6 | Prmt6 | Ovgp1 | Ddx5 |
| Ssr4 | Adap1 | Atp10a | Styxl1 |
| Lcmt1 | Pparg | Jagn1 | Poc5 |
| Chac1 | Cdk2 | Bora | Papss2 |
| Arih1 | Neu1 | Mrpl21 | Bcl2a1c |
| Arntl | Tmem245 | Slain1 | 9930021J03Rik |
| Podxl | Gfpt1 | Tmem86a | 4921511C20Rik |
| Helz2 | Srarp | Rab43 | Sympk |
| Kdm5c | Jak1 | Ranbp10 | Psg20 |
| Sec14l4 | D930020B18Rik | Abhd17a | Tas2r134 |
| Pes1 | Iqcb1 | Epha8 | Henmt1 |
| Zfp335 | Klk1b4 | Tmem251 | Nr0b1 |
| Dcaf12 | Cnot2 | Lypd1 | Eif3e |
| Mir666 | Atp1b3 | Cldn18 | Ctsw |
| Sytl5 | Stk24 | Mapkap1 | Col28a1 |
| Src | Adck5 | Zfp800 | Kcng3 |
| Hspd1 | Ssna1 | Popdc3 | Ccdc88c |
| Ankrd11 | Tagln | Plppr1 | Hyal6 |
| Htt | Large1 | Smo | Doc2g |
| A1cf | Rufy3 | Crocc2 | Antxr1 |
| Prkd3 | Gmeb1 | Axl | 2010003K11Rik |
| Ddost | Hspb2 | Pamr1 | Atp8a2 |
| Slc35b1 | Eif2s2 | Ccnk | Krt34 |
| Ociad2 | Tsc22d2 | Pkhd1 | Fam149b |
| Tstd2 | Fbxo4 | Fahd1 | Siah1b |
| Chac2 | Lyz1 | Eif3i | Pou6f1 |
| Cygb | Mvb12b | B430306N03Rik | Nprl3 |
| Trim33 | 4933427D14Rik | Snx9 | Gsto2 |
| Ggh | Manea | Nlrp6 | Ttc28 |
| Snx7 | Fblim1 | Nfyc | Olfr609 |
| Hspb6 | Nop10 | Epb41l4b | Prr11 |
| Rnf181 | Poldip2 | Rtkn | Vmn2r-ps11 |
| Cct5 | Rln1 | Ech1 | Vwc2 |
| Il4ra | Slfn2 | Cyth2 | Olfr1278 |
| Mospd1 | Ckap4 | Nexmif | Proz |
| Arfgef1 | Marchf6 | Arhgef7 | Gm9734 |
| Fgfr1op2 | Wbp1l | Slc25a31 | Fgg |
| Sestd1 | Scrn3 | Cdh10 | Rwdd3 |
| Nploc4 | 1810064F22Rik | Marveld2 | Kri1 |
| Rfwd3 | Tbc1d10a | Snrpd1 | Hdgfl3 |
| Pold3 | Efna3 | 1700020L24Rik | Olfr802 |
| Otud7b | Ndufb11b | Cyp4f41-ps | N4bp3 |
| Neo1 | Cndp2 | Bmt2 | Dennd11 |
| Aurkaip1 | Has1 | Mir149 | Ing3 |
| Fip1l1 | Khk | Olfr120 | Ube2c |
| Pyroxd1 | Cul7 | Cfc1 | Prok2 |
| Slc30a5 | Cry2 | Apc2 | Cyb5rl |
| Diaph1 | Cux2 | Pikfyve | Socs7 |
| Nfix | Plin3 | Aard | Cbr2 |
| Dnaja2 | Rnf40 | Zfp873 | Rasgef1b |
| Tlk2 | Dnajc7 | Hes2 | Arxes1 |
| Sec24d | Cldn15 | Prpf4 | Plau |
| Slc25a45 | Ap1g2 | 4732471J01Rik | Smap2 |
| Taf9 | Iglon5 | Cntrob | C1ql4 |
| Hif1a | C1galt1 | Mapk1 | Acsf3 |
| 1700028J19Rik | Ppat | Gtpbp3 | Adad1 |
| Slc2a1 | Wnt10a | Hao1 | Zfp318 |
| Nedd4 | Cela3a | Aoc3 | Morn1 |
| Gnl3 | Lzts2 | Rundc3a | Spef2 |
| Eno1 | Crb3 | Olig2 | Pfn3 |
| Fam174b | Krtap9-3 | Pitpnm3 | 1700020A23Rik |
| Spcs1 | Cped1 | Arhgap9 | Tnnc2 |
| Setd2 | Brms1l | Arid3c | Tmem200a |
| Parp8 | Dnaaf5 | Nfatc2 | Nup210l |
| Serf2 | Nob1 | She | Ttc12 |
| Zfp871 | Csf2ra | Sh3bp5 | Defb25 |
| Atg2a | Tcp1 | Safb | Cmtm3 |
| Lingo3 | Hint1 | Rps28 | Clcn5 |
| Mir216b | Tmem235 | Dio2 | Snap29 |
| Pxmp4 | Nufip2 | Robo3 | Klhl14 |
| Pafah1b1 | Slc6a9 | Mgat5b | Cd180 |
| Nop14 | Sun2 | Adgrl4 | Arid5a |
| Dlg5 | Cpeb4 | Kin | Ccdc116 |
| Sting1 | Atp5l | Npff | Zfp11 |
| Trim35 | Slc25a29 | Gm10714 | Il17b |
| Dhx9 | Clock | Tfip11 | Mob3c |
| Exosc8 | Tln2 | Snrpb2 | Bet1l |
| Trim24 | Cldnd1 | Ccdc57 | Gpx7 |
| Nsfl1c | Usp39 | Fhl1 | Irs2 |
| Dcbld2 | Yy1 | Cyhr1 | Sstr2 |
| Cpeb3 | Cystm1 | Atpaf2 | Olfr215 |
| Clcn2 | Slc25a5 | Plk4 | Atp23 |
| Rnf141 | Drap1 | Mtbp | Pilrb2 |
| Vipr1 | Tcf15 | Col20a1 | Grp |
| Septin7 | Dclre1c | Smpd3 | 2810025M15Rik |
| Yap1 | Stk38 | Taok1 | Ip6k3 |
| Pcyox1 | Car9 | Ly6g6e | Rora |
| Nedd9 | Get4 | Gm36589 | Dnajc24 |
| Lgmn | Brms1 | Rtn4rl1 | Dennd6b |
| Adh5 | Hdgfl2 | G530011O06Rik | Olig1 |
| Nudt21 | Pim2 | Plxdc2 | Ikzf3 |
| Scand1 | Gigyf2 | Ccdc69 | Hnrnpd |
| Zdhhc4 | Yod1 | Oacyl | Wdr47 |
| Bscl2 | Tmem102 | Cdk20 | Tppp2 |
| Arid5b | Repin1 | Cbx4 | Brip1 |
| Gnptg | Mfsd14b | Fam234a | Ms4a8a |
| Prkcd | Ndufaf3 | Ccsap | Pdcd2l |
| Iffo2 | Stard3nl | Tbc1d20 | Hoxb2 |
| Kctd20 | Gm10244 | Mief1 | Zfp37 |
| Rest | Abcb1b | Olfr91 | Tnfrsf25 |
| Ripk4 | Zfp326 | Gm45914 | Thsd7a |
| Trnt1 | Fmo5 | Osgepl1 | Atp5b |
| Rtn4rl2 | Ttc23 | Uroc1 | Slfn8 |
| Eri1 | Nkx1-2 | Adam20 | Ormdl2 |
| Tcerg1 | 4932438A13Rik | Plscr4 | Nme4 |
| Crem | Stx4a | Rrp9 | Olfr96 |
| Gstt2 | Tril | Tsnax | 2410018L13Rik |
| Anapc16 | Aff1 | Mospd2 | Farp2 |
| Osbpl5 | Cd164l2 | Avl9 | Klra21 |
| Cbl | Hsf4 | Ndufs2 | Snrpg |
| Vps41 | Mir194-2 | Lkaaear1 | Ankzf1 |
| Flcn | Nkain4 | Cd8a | Fuz |
| Fsd1l | Decr1 | Smarcc1 | Pilrb1 |
| Herc4 | Mfsd1 | Sar1a | Rgs4 |
| Bckdk | Arl4a | Fan1 | Galnt14 |
| Plaa | Olfr1395 | Krit1 | Castor1 |
| Dlg2 | Fbxo15 | Hnrnph1 | Pabpc4l |
| Tm9sf3 | Klhl36 | Pklr | Lrrc30 |
| Isg20l2 | Ttc5 | Rara | Ecsit |
| Asb8 | Ahrr | Isl2 | Adgrg6 |
| Rev1 | Sco1 | Wfs1 | Skap1 |
| Capza1 | Cdc26 | Adra1b | Srbd1 |
| Fev | Gpr161 | Arg2 | Cd300ld |
| Mmp19 | Mfsd14a | Gm715 | Mir34c |
| Prkcsh | Ecm1 | Clic3 | Haao |
| Gys1 | Cers5 | Fbxl12os | Tssc4 |
| Sugt1 | Cldn23 | Frmd8 | Wdr46 |
| Klf14 | Adam33 | Plcd1 | Kmt2d |
| Tmem221 | Snord37 | Ngrn | Nsmaf |
| Ambra1 | Rhbdl1 | Pard6a | Tnni1 |
| Smn1 | Myoz3 | Six3 | Otof |
| Trpv6 | Limd1 | Rsph9 | Prr5l |
| Mmp3 | Pigg | Zfat | Gem |
| Pdcd6 | H1f7 | Rinl | Ceacam2 |
| Strn | Kcnj15 | Hadha | Cic |
| Tmx2 | Ccnc | Rnf114 | Hsd17b14 |
| Tnfaip6 | Arfgap3 | Cnih3 | Stfa1 |
| Elk4 | Prob1 | Zfp444 | Map4k2 |
| Lmna | Nrgn | Ache | Stambp |
| Aldh7a1 | Kpna6 | Kcnk15 | Nme6 |
| Capns1 | Snord22 | Bod1l | Psmg4 |
| Atp5c1 | Pfkfb3 | Wdfy3 | Bpifb4 |
| Gpc4 | Sap30bp | Mir345 | Sh2d1a |
| Bpnt1 | Arhgdig | Mief2 | Enpp3 |
| Cluh | Lta4h | Caln1 | Car4 |
| Vps37b | Stx5a | Amn1 | Sdk2 |
| Aldh9a1 | Dek | Lins1 | Nutm2 |
| Nfatc1 | Gltpd2 | Tmod2 | Snord35b |
| Nudt12 | Tesc | CK137956 | Mill2 |
| Dab2 | Msl1 | Klk1b24 | Igk-V28 |
| Wdfy1 | Dlk2 | Larp1 | 6330549D23Rik |
| Upp2 | Mir680-3 | Cib4 | Mageb5b |
| Adam17 | Lrrc10b | Nppc | Col18a1 |
| Dennd5a | Polr1f | Msl3l2 | Cdc27 |
| Hccs | Plekha5 | Stpg1 | Il17rb |
| Abat | Ncoa5 | Inppl1 | Rab4b |
| Cdc42 | Psen1 | Pdlim2 | Fbxl8 |
| Cpsf2 | Vwa3b | Lcp2 | Nalcn |
| Setx | Skiv2l | Spata5l1 | Cpne9 |
| Cyfip1 | Kcns3 | Slc4a8 | Rarres1 |
| Ipo4 | 4930577N17Rik | Socs5 | Olfr1346 |
| Zfp954 | Spout1 | Snrnp70 | 4833422C13Rik |
| Mrps30 | Thoc3 | Rpl21 | Sdc2 |
| Cpe | Pi4k2b | Olfr460 | Cep85 |
| Ndufs6 | Chmp2a | Vmn1r237 | Mbd4 |
| Mtfr1 | Cul2 | Zfp36l3 | Gpat3 |
| Tmem242 | Mtrr | Dynlt4 | Churc1 |
| Mlx | H4c14 | Olfr455 | Setdb2 |
| Supt20 | Mpp2 | Smim5 | Gpalpp1 |
| Gpatch4 | Snph | Cecr2 | Pgr |
| Itga5 | Ppp1r18 | Nckap5l | Gnat1 |
| Vat1 | Dyrk3 | Mdm4 | Tmem222 |
| Dagla | Selenow | Rab11fip4 | Olfr918 |
| Zmat3 | Clp1 | Pycr1 | Cdh16 |
| Mrps34 | Nup155 | Pcdh12 | Derl1 |
| Gprc5c | Dlgap3 | Krtap3-1 | Mllt1 |
| Dpp8 | Tmem200b | Prpf3 | Smarca1 |
| Gm9954 | Dnajb4 | Eif1b | Mab21l2 |
| Asap2 | Mtmr14 | Arntl2 | Pard3b |
| 5930403L14Rik | N4bp2l1 | Zfp407 | Acsbg3 |
| Large2 | Grsf1 | Olfr1225 | Slc10a7 |
| Ddrgk1 | Scaf8 | Zfp958 | Cracr2b |
| Azgp1 | Setdb1 | Mcc | Xkr7 |
| Hilpda | Fbxo44 | Tppp | Terb2 |
| Pls3 | Pgp | Ackr4 | Olfr1499 |
| Pdx1 | Zfp827 | Lrrc36 | Arsi |
| Papss1 | Pias3 | Slc25a4 | Zfp292 |
| Aco2 | Clta | Tsen2 | Mesd |
| Dtnb | Rps6kb2 | Gtpbp10 | Sbpl |
| Dbf4 | Cpne7 | Cd24a | Zkscan8 |
| Hnmt | Maml3 | Ect2 | Bod1 |
| Slc25a10 | Slc38a10 | Mei4 | Mmd2 |
| Slc38a7 | Cbwd1 | Abhd18 | Stxbp4 |
| Cd93 | Prodh2 | Btnl5-ps | Unc79 |
| Utp11 | Snrnp200 | Ptprd | Olfr1443 |
| Dph2 | Ankrd34a | Col4a3 | Spata32 |
| Trappc9 | Cd84 | Mymk | Tph2 |
| Lrrc8e | Ik | Hs3st2 | Slc16a14 |
| Sbf1 | D6Wsu163e | Pdgfra | Bbox1 |
| Amy1 | Mrtfb | 4921536K21Rik | Dcaf12l2 |
| Smad2 | Dolpp1 | Adcy1 | Snapc5 |
| Nfkb1 | Cavin2 | Nf1 | Olfr646 |
| Bola3 | Klf8 | Atp6v1c2 | Olfr1462 |
| Acsf2 | Ap3s2 | Ythdf3 | Myo18b |
| Iars | Lrrc26 | Tsn | Bcl9l |
| Psmg1 | Akirin1 | Lig3 | Slamf8 |
| Trib1 | Slc4a1ap | Lce1h | Qrich2 |
| Tpp2 | Prkar1b | Itga8 | Tjp3 |
| Pitx3 | Ap1m1 | Wdr38 | Itgbl1 |
| Fgd4 | Fut8 | Xpnpep1 | Alkbh6 |
| Gpr107 | Hspa5 | Zscan20 | H2-Oa |
| Tcf7 | Perp | Olfr198 | Mmaa |
| Dcp1a | Lypd5 | Ddx18 | Cul9 |
| Nelfb | Zfp651 | Gm10445 | Zfp784 |
| Hspa9 | Ptprcap | Fars2 | Cdv3 |
| Lrrc8b | Cul3 | Gm5176 | Cbln1 |
| Rae1 | Prmt5 | Zhx3 | Dact1 |
| Acp6 | Atp6v0b | Chil6 | Parpbp |
| Creg1 | Atoh8 | Themis | Prox1 |
| Nrd1 | Sppl3 | Fam120c | Pef1 |
| 2210016L21Rik | Tlr13 | Fbxo10 | Pcnx |
| Ccdc166 | Epb41l1 | Cavin3 | Ttll6 |
| Thumpd1 | Cutc | Vps18 | Olfr1428 |
| Ireb2 | Krt17 | Cd300c2 | Fkbp6 |
| Dhrs13 | Slc22a13 | Hspa14 | Mef2d |
| Jpt1 | Serp2 | Lxn | Csn2 |
| Rtraf | H2bc9 | Cds1 | Spry3 |
| Vps13c | Plaat3 | Vpreb2 | Gltp |
| Wdr41 | Isca2 | Suco | Mx1 |
| Gal | Aldob | Agl | Sel1l3 |
| Dnajc30 | 1700029F12Rik | Mir135a-1 | Slc35c1 |
| Krt80 | Hbs1l | Phc2 | Plekho1 |
| Atad3a | Rbm10 | Prr15 | Ascc1 |
| Psmd14 | Ung | Fndc10 | Anln |
| Fxr2 | Cer1 | 1600029O15Rik | Mat2b |
| Rab6a | Aup1 | Ahr | Ces2g |
| Gpx4 | Idh3b | Mef2c | Pfkfb1 |
| Nr2f2 | Spint2 | Trafd1 | Synpo2 |
| Grhpr | Fyb | Fzd10os | Gm973 |
| Vps50 | Gpsm3 | Gpr85 | Dkk1 |
| Zfp710 | Tst | Dpep2 | Afm |
| Dync2h1 | Barhl1 | Birc7 | Opn4 |
| Khdc4 | Slc25a25 | Rapsn | Jmjd1c |
| Denn2b | Enho | Dpysl3 | Rbm39 |
| Clec11a | Tgfb1 | Pds5a | Zfp946 |
| Rnf121 | Cmss1 | Dusp19 | Piwil1 |
| Gch1 | Pink1 | Obsl1 | Haus1 |
| Dhx8 | Mir24-2 | Acp1 | Itm2c |
| Manf | Focad | Pnpla8 | Tkt |
| Pfkm | Osbpl2 | Dcbld1 | Camk2g |
| Adam10 | Ss18l2 | Slc44a2 | Ndufb10 |
| Lmtk3 | Pik3c3 | Znhit2 | P3h3 |
| Tcn2 | Cd59b | Fnip2 | Wdtc1 |
| Slc41a2 | Habp4 | Adam21 | Cxcr2 |
| Pdia6 | Cdo1 | Zfp735 | Elp1 |
| Hs3st3b1 | Tmem41a | Ngfr | Mei1 |
| Foxa3 | Ddx1 | Exoc5 | Magef1 |
| Tubgcp4 | Treml1 | Sik3 | Atp4a |
| Yipf2 | Ddx6 | Hs6st1 | Serpinb10 |
| Gfi1 | Rad52 | Gpr89 | Zscan18 |
| Nup133 | Tmem115 | Slf1 | Zfp418 |
| Mpeg1 | Otp | Zc2hc1b | Csf2rb |
| Hnrnpab | Defb1 | BC002189 | Pgghg |
| Mboat1 | Ptch1 | Ahctf1 | Ckmt1 |
| C1rl | Hpdl | Fam133b | Pkdcc |
| Ccdc6 | Epb41l2 | Pcdhb5 | Arhgap25 |
| Jade3 | Tmem81 | Ifnar2 | 4930503L19Rik |
| Dpyd | Timp2 | Klk1b5 | Gemin7 |
| Per1 | Rufy4 | Gng3 | Aifm2 |
| Ndufa8 | Gm11529 | Olfr765 | Ufm1 |
| Tnfrsf10b | Ppp1cb | Gpt2 | Bnipl |
| Foxd2 | Pla2g4a | Srsf10 | Map3k8 |
| Usp36 | Abt1 | Fxyd7 | Olfr845 |
| Syne2 | Shpk | Ubr2 | Kcna10 |
| Ndufb8 | Trip12 | Unc5a | 4930447A16Rik |
| Dtx2 | Camsap3 | Gm48957 | Thap2 |
| Syt12 | Plagl2 | Rassf2 | Gm11545 |
| Trim30a | Ksr2 | Asb15 | Lgsn |
| Ficd | Ccdc25 | Cpped1 | Plat |
| Spsb3 | Cd82 | Phyh | Mdfic |
| Fmo1 | Rchy1 | Kcnab3 | Sertad4 |
| Cdk5rap3 | Rmdn1 | Hspb9 | Shroom4 |
| Ormdl1 | Drc1 | Pcnt | Ush2a |
| Alad | Chuk | Vmn1r6 | Carmil3 |
| Aqp9 | Ighmbp2 | Sfmbt1 | Tmcc2 |
| C3ar1 | Spryd4 | Tll2 | H2bc22 |
| Peak1 | Fzd3 | Zdhhc19 | Serpina3k |
| Cavin1 | Pepd | Heyl | Olfr484 |
| Celf1 | Scn5a | Clec4b2 | Wdr86 |
| Anapc7 | Nudt13 | Shisa7 | E2f3 |
| Foxe1 | Svbp | Pwwp2b | A430090L17Rik |
| Ssr3 | Rlf | Tfpi2 | Tuba4a |
| Mir187 | Ccdc92 | Csrp2 | Tmem199 |
| Igsf3 | Crtc1 | Pphln1 | Ttc1 |
| Caprin1 | Dock1 | Tbc1d23 | Herc2 |
| Ggct | Rac1 | Fra10ac1 | Slc13a2 |
| Cops3 | Adrm1 | Tmem89 | Gpc2 |
| Tle6 | Cd163 | Slc24a3 | Zfp944 |
| Rnf167 | Ctdsp1 | Eif5b | Mex3d |
| Auh | Arhgap1 | Ccdc84 | Pygl |
| Eed | Inpp5d | Capn8 | Hexim1 |
| Dclk3 | Cited4 | Apoa1 | Tcf19 |
| Sod2 | Prrt1 | Coa4 | Susd3 |
| Pex11b | Mier2 | 1700120K04Rik | Gja8 |
| Polr1b | Dennd2c | Zfp750 | Prg2 |
| Tmem106b | Slc25a51 | Mycbp | Rnf183 |
| Prrg4 | Emc2 | Prelid1 | Hoxd8 |
| Rrp12 | Nupr1l | Tgfb3 | Rnpep |
| Nme3 | Cryl1 | Snord52 | Pan2 |
| Pigb | Tlr12 | Fa2h | Dlgap4 |
| Nop9 | Bcs1l | Stxbp6 | Ccdc115 |
| Itgam | Cct7 | Tex33 | Trim7 |
| Sinhcaf | Smyd3 | Gtf2h2 | Vmn1r176 |
| Gck | Cipc | Aftph | St13 |
| Tbc1d30 | Ago3 | Gen1 | Fabp6 |
| Alg9 | Zeb2 | Olfr1377 | Kiz |
| Mlkl | Gfer | Radx | Col11a1 |
| Cybc1 | Cyth3 | Bhlhe23 | Irx5 |
| Arsg | Dock7 | Top1 | Mgp |
| Zfand1 | Myo1b | Dok1 | Magi2 |
| Tmem135 | Cars2 | Srrd | Adig |
| Smchd1 | Polr3gl | Pcdh17 | 4930579G24Rik |
| Mtmr11 | Slc48a1 | Gdf6 | Olfr1020 |
| Dnajb1 | Slc35b3 | Gm9733 | Gm5409 |
| Ids | Gsg1l | Ipo8 | Kcnd2 |
| Lrpap1 | Ifitm6 | Chmp5 | Lime1 |
| Atp5g1 | Atp13a4 | Proser3 | Adamts15 |
| Leprotl1 | Csde1 | Phlda2 | Tgm7 |
| Spop | Kmt5b | Bmi1 | Aagab |
| Nbeal1 | Carmil2 | 4933432I09Rik | Maf1 |
| Zfp131 | Gnat2 | Coro1a | Bahcc1 |
| Kdm3b | Garnl3 | Olfr598 | Gm14207 |
| Atxn2 | Plbd2 | Trappc2 | Sema6b |
| Snhg5 | Pwwp2a | Pla2g10 | Capsl |
| Rps6ka2 | Gramd3 | Rap1gap2 | Nlrp4b |
| Prr23a1 | Prpsap2 | Trim26 | Them4 |
| Alg6 | Sfswap | Bcap29 | Usp34 |
| Usp24 | Fam180a | 4930596D02Rik | Vmn1r85 |
| Tbc1d2b | Tfpi | Sri | Prss44 |
| Echdc1 | Gm2a | Fbxo31 | Prss36 |
| Ubl5 | Spata13 | Dtx4 | Apoa5 |
| Vmac | Oplah | Rarg | Tnfrsf17 |
| Palm3 | Cul5 | Igkv4-55 | 9430069I07Rik |
| Prkcz | Thoc5 | Esx1 | Pdgfrb |
| Zfp324 | Smad9 | Kif1b | Borcs6 |
| Fiz1 | Timm22 | Zbtb18 | Gpr75 |
| Bin1 | Fyn | Dennd5b | Tipin |
| Slc30a4 | Gstcd | Eomes | Usb1 |
| Nat8f1 | Myct1 | Mcfd2 | Cxcl12 |
| 1110065P20Rik | Ranbp3l | Slc22a18 | Arnt2 |
| Rbms1 | Dhrsx | Iqcd | Dmtf1l |
| Hrk | Acbd6 | Ephb1 | Rpl36a |
| Rhoa | Cyp2c50 | Angptl2 | Olfr742 |
| Prkar2a | Pkdrej | Mtch2 | Lrguk |
| Cltc | Trav8d-1 | 3110040N11Rik | Slc35e2 |
| Gpr155 | Wfdc1 | Tmem53 | Rasgef1a |
| Rhoj | Ankrd24 | Tsc1 | Gpr3 |
| Gpam | Pam16 | Qrfp | Rspry1 |
| Helz | Map3k1 | Mthfsd | Map2k2 |
| Pi4k2a | Cops9 | Mir152 | 2610528A11Rik |
| Gipc3 | Sin3a | Sc5d | Cep164 |
| Lsr | Ergic3 | Mrps22 | Pcmt1 |
| Zfp64 | Rpap3 | Bcl9 | Zfp51 |
| Zbtb34 | Sprr1b | Zfp706 | Olfr593 |
| Vwa8 | Mafk | Dmtn | 4930550C14Rik |
| Senp6 | Ncoa7 | Ola1 | Tmem207 |
| B4galt3 | Trim11 | Taf3 | Sec22c |
| Ly6a | Tyms | Pbxip1 | Gm10371 |
| B630019K06Rik | Cyp2d22 | Vcam1 | Olfr124 |
| Sdr9c7 | Cys1 | Snora31 | Srsf9 |
| Pigp | Slc18a3 | Zcchc13 | Ly6m |
| Paics | Mblac2 | Slc25a32 | Gmps |
| Parp12 | Acox3 | Atad2b | Cntnap3 |
| Ablim1 | Dock9 | F5 | Impdh2 |
| B3gnt3 | Tmem140 | Ttc7 | 1700019M22Rik |
| Septin9 | Tsen34 | Ehd3 | Oxr1 |
| Trpc4ap | Sdcbp2 | Map3k3 | Srsf4 |
| Ipo5 | Lhb | Rhbdd3 | Olfr15 |
| Chst13 | Ccdc92b | Slc30a1 | Slc9a5 |
| Ogfr | Steep1 | Nab1 | Slc2a4rg-ps |
| Cep20 | Spice1 | Cplx1 | Ap2s1 |
| Wdr12 | Elovl5 | Vwa2 | Cc2d1a |
| Nucb2 | Polg | Mt4 | Olfr1441 |
| Tinag | C1galt1c1 | Mcrs1 | Tlr7 |
| Amdhd2 | Atg16l1 | Trip13 | Smc2 |
| Cdk13 | Snora41 | Bst1 | Nbea |
| Psme3 | Mettl14 | Gm7008 | Tcea1 |
| Dusp3 | Babam1 | Znrf4 | Ftl1 |
| Amigo1 | Cdh4 | Icam2 | Dusp13 |
| Adi1 | Calm1 | Arl2 | Lztfl1 |
| Narf | Spryd7 | Esr2 | Zfp599 |
| Rif1 | Spr | Chpf | Stoml1 |
| Cep83 | Ablim2 | Wtip | Gnpnat1 |
| Ahcyl2 | Gorasp1 | Slc41a3 | Coq3 |
| Atxn3 | 4930453N24Rik | Sdc3 | Lig1 |
| Hdac10 | Steap3 | Defb42 | Smpd4 |
| Dkc1 | Sdsl | Frat1 | Olfr1158 |
| Thumpd3 | Hacd3 | Adamts6 | Bend5 |
| Cyfip2 | Haus5 | Pde1a | Eef1a1 |
| Dhx15 | Impa2 | Mocs3 | Ska2 |
| Rasef | Phf8 | Thnsl2 | Defb11 |
| Cct6a | Rab20 | Ldah | Ptprb |
| Tmem106c | Sirt3 | Cops8 | Trim15 |
| P2rx1 | Ammecr1 | Eno4 | Cyp4x1 |
| Rcbtb1 | Slc25a33 | Clcnkb | Hnf4g |
| Izumo4 | Ranbp9 | Dydc2 | Phactr2 |
| Hmx1 | Fuca1 | Zdhhc8 | Ppcdc |
| Zfand5 | Nipal2 | Fam162b | Fam118b |
| Ccdc86 | Mybph | Gpr6 | Qpctl |
| Foxo4 | Cat | Prc1 | Trav14d-3-dv8 |
| Emc9 | Vamp4 | Comp | Zbtb8b |
| Pitpna | Zbtb9 | Fam120b | Galntl6 |
| Hsf1 | Ldlrad3 | Zmiz1 | Hdac3 |
| Dgkz | Dlx2 | Pms2 | Igf1os |
| Gas8 | Tmem165 | Sp1 | Ramp3 |
| Cd151 | Ebag9 | Hsd17b6 | Tyms-ps |
| Mkx | Tmem129 | Olfml1 | Paqr4 |
| Utp3 | Ddc | Trpv4 | Flrt3 |
| Slc6a4 | Dclre1a | Clec7a | Lpcat2b |
| Lsm8 | Chchd6 | Rassf8 | Obox5 |
| Gab2 | Afg3l2 | Cbx2 | Atp9a |
| Fbxw8 | Rtf1 | Traf3ip1 | Zfp524 |
| Mtus1 | Pld2 | D130043K22Rik | Zfp202 |
| Trim50 | Kmt2e | Dhrs7c | Serpinf1 |
| Cyp1b1 | Prkab2 | Cdk19 | Rab38 |
| Ahnak | Fosl1 | Fam174a | Lect2 |
| Nopchap1 | Naglu | Pspn | Gata2 |
| Ppara | Kctd7 | Lncpint | Tle3 |
| Egr4 | Pitx1 | Ucp2 | Cited2 |
| Myo5b | Zfp580 | Abcg5 | Rnf130 |
| Garem1 | Timm13 | Fancg | Arf5 |
| Ppm1a | Bbln | Tmc8 | Nelfa |
| Vps13b | Ucn | Ergic1 | Srrt |
| Mkrn1-ps1 | Osbpl8 | Mrc1 | Pigk |
| Trip10 | Slc40a1 | Zbed5 | Pex12 |
| Slc6a15 | Cobll1 | Chmp6 | Tmem139 |
| Gm7102 | Spry1 | Cttnbp2 | Mir215 |
| Romo1 | Bdh1 | Zfp764 | Sp140 |
| Arf6 | Crct1 | Axin2 | Prickle4 |
| Nkx1-1 | Fas | Nfs1 | Trmt11 |
| Sfxn1 | Ikbip | Fbxw7 | Kbtbd6 |
| Copg2 | Odf3b | Epha10 | Slc13a4 |
| Fam222a | 4930426D05Rik | Alb | Meaf6 |
| Rprl3 | Bean1 | Olfr1151 | L1Md-A101 |
| Kcnip2 | Dpy19l3 | Acbd4 | Atp6v1g3 |
| Selenbp1 | Ggnbp2 | Smyd4 | 6230400D17Rik |
| Antkmt | Dusp28 | Onecut2 | Cldn14 |
| Adamts9 | Ranbp6 | Ciapin1 | Olfr1259 |
| Ciart | Wrnip1 | St6galnac5 | Tex14 |
| Taf1a | Tgm5 | Corin | Nisch |
| Ogfod2 | Esrp1 | Ermap | Grm8 |
| Srp14 | Grina | Zfp658 | Prss55 |
| Mak16 | Guca1b | Mcph1 | Myh1 |
| Taf12 | Yae1d1 | Mthfd2 | Aspa |
| Cwc22 | Pde8b | Pomt2 | Hpd |
| Armc8 | Rprm | Slc7a13 | Donson |
| Rhbdl3 | Ndufb6 | Pxn | Trpm2 |
| Rnf169 | Fkbp15 | 4930578I06Rik | Cldn34b2 |
| Gcat | Kbtbd11 | Eif2s3x | Amh |
| Hgfac | Adal | Mmadhc | Pcsk6 |
| Zfpm1 | Abcb7 | Bola2 | Angptl6 |
| Lgals3 | Anapc15 | Gm1965 | Kif20b |
| 5730409E04Rik | Tssk6 | Pttg1 | L3mbtl1 |
| Vps37d | Arl6ip4 | Il1b | Pgbd1 |
| Smu1 | Cxcl14 | Golga4 | Dnah3 |
| 1700086O06Rik | Tmem120a | Shf | Gja3 |
| Stx7 | Miga2 | Pnpla7 | Pip4k2b |
| Lyrm9 | Pygo1 | Ctsd | Slc2a5 |
| Tnrc6b | Gm10640 | Cdk11b | Tle2 |
| Scn4b | Panx2 | Phf7 | Vmn1r49 |
| Prdx6 | Pm20d1 | Slc14a2 | Gm5577 |
| Aifm1 | Fpgs | Tgs1 | Slc6a1 |
| Dnajc2 | Apoe | Tbcc | Olfr1023 |
| Rps27l | Nktr | Prcd | Il17rc |
| Saa3 | Gdi1 | Btg1c | Arhgap20 |
| Zbtb7a | 2610507B11Rik | Dpagt1 | Cfap161 |
| Ndufa6 | Fcgr3 | Atp7a | Vstm2b |
| 4930445K14Rik | Pgap2 | Qars | Ceacam14 |
| Tpr | Cgnl1 | Smco2 | Snx29 |
| Csad | Txlng | Ppef2 | Ak5 |
| Uspl1 | Cant1 | Mtus2 | Vxn |
| Misp3 | Pstpip2 | Pigo | Rwdd2a |
| Bloc1s2 | Zfp125 | Parp9 | Olfr212 |
| Eci1 | Dmrt3 | Cysltr1 | Chrdl1 |
| Fn1 | Rapgef1 | Morc1 | Sirt6 |
| Sec61b | A630052C17Rik | Agtrap | Ovol3 |
| Fads6 | Kcnd3 | Serinc1 | Cyp4f15 |
| Bcl7a | Gde1 | Gm1549 | Apcdd1 |
| B3gnt2 | Gmfb | Vsig8 | Slc5a6 |
| Casp8 | Mon2 | Ctns | Ccdc102a |
| H2az2 | Bmp2 | Htra1 | 6030498E09Rik |
| Tlcd3a | Tma7 | Rpp38 | Ppp1r3b |
| Atp5e | Fgd3 | Ubn1 | Rgr |
| Pex11g | Cyc1 | Olfr1213 | Gramd4 |
| Dnajc19 | Ppfia4 | Nfam1 | Slc25a54 |
| Qtrt1 | Swi5 | Cd209f | Kir3dl2 |
| Ak4 | Prss23 | Ppdpf | Nrip2 |
| Rab2a | Uevld | Acat3 | Cox8c |
| Clec4d | Tmem98 | Cpxm2 | Rnase13 |
| Adipor1 | Paxbp1 | Orc6 | Lmtk2 |
| Uqcrfs1 | S100a6 | Pick1 | Olfr798 |
| Sfn | Ap3s1 | Spire2 | Tagap |
| Abr | Cep290 | 2410080I02Rik | Olfr1500 |
| Qtrt2 | Matn2 | Chrna6 | Cfap52 |
| Iah1 | Fance | Dusp12 | Hey2 |
| Ruvbl1 | Mrpl32 | Igfbp1 | Agrn |
| Rcl1 | Ganab | Mrps18c | Slc27a2 |
| Ddx23 | Copa | Serpinb6b | Ube2dnl2 |
| Zdhhc18 | Arid3b | Igsf6 | Tex49 |
| Procr | Mir7-1 | Tmem175 | Rnf144b |
| Rpusd4 | Hoxa13 | 9530002B09Rik | Spats2l |
| Cldn3 | Them6 | Phf21b | Apln |
| Slc2a8 | Zzz3 | Hepacam | Zfy2 |
| Stx3 | Kremen2 | Rbm8a2 | Lsm3 |
| Tmem62 | Mrps26 | Prom1 | 1700021F07Rik |
| Lrch3 | Unc13b | Triqk | Relb |
| Ampd3 | Hectd3 | Olfr95 | Fbn2 |
| Etv3 | Gng7 | Coro2b | Rbm3os |
| Asb13 | Mymx | Tppp3 | Psmd5 |
| Aqp5 | Edem3 | Uts2r | Fut4 |
| Pbld2 | Rsrc2 | Trim71 | Ogfrl1 |
| Cdkn1b | Foxd1 | Obi1 | Myadml2 |
| Rab5a | Zfp143 | Rcsd1 | Lypd10 |
| Phlpp2 | Pura | 1700028P14Rik | Sra1 |
| Ptp4a2 | Adipor2 | Phf11d | Tmem132e |
| Prdm16 | Get1 | Ascl4 | Olfr1314 |
| Skap2 | Krtap17-1 | Cacna2d4 | Olfr711 |
| Atp2b1 | Pld6 | Gabrd | Garre1 |
| Slc39a10 | Crnkl1 | Tmed1 | Edrf1 |
| Ror2 | Bcl3 | C1qtnf1 | Btg1b |
| U2af1 | Cebpz | Slc66a2 | Vmn1r51 |
| Eea1 | Urah | Rab7 | Arhgef11 |
| Wdr36 | Stk35 | Atg4c | Sst |
| Ndufa1 | Ercc6l2 | Slc16a9 | Marchf4 |
| Mfge8 | Grhl1 | Ifit1 | Morn5 |
| Puf60 | Epc2 | Ube2q1 | Rabep1 |
| Nipa2 | Gapvd1 | Myf5 | Uckl1 |
| Rnd3 | Vamp2 | Tm6sf1 | Kcnj10 |
| Rbm22 | Dpm2 | Mrgprx2 | Rybp |
| Erh | Ap1b1 | Txlna | Ryr1 |
| Arhgap17 | Scara5 | Upf3a | Olfr854 |
| Paxx | Trim21 | Agpat4 | Cyp3a44 |
| Agk | Arl1 | Scap | Defb30 |
| Snord95 | Rtp4 | Neurog3 | H3c15 |
| Ran | Tmem248 | Rab9 | Brpf1 |
| Nxt2 | Sfi1 | Mir323 | Cd8b1 |
| Wnt3a | Hipk3 | Dnm1 | Prl7a2 |
| Tmc3 | Armc6 | Sorbs3 | Klhdc4 |
| Dram1 | Tlcd3b | Cts8 | Olfr1195 |
| Col9a2 | Asap1 | Pask | Acvr1c |
| Mical2 | Plekhg2 | Gm5897 | Slc22a22 |
| Nacc1 | Mrtfa | Olfr373 | Cplx4 |
| Myrip | Immp2l | Slc17a4 | Doc2a |
| Mkln1 | Ubxn1 | Fam210a | Sox10 |
| Fkbp3 | Ptcra | Gtf2e1 | Slc38a4 |
| Slc12a8 | Ppp1r14a | Rapgefl1 | Neto1 |
| Uggt1 | Nccrp1 | Nr2c2ap | Olfr1026 |
| Stk4 | Col6a6 | Fbxo45 | Pacrg |
| Mrps16 | Mterf3 | Mgme1 | Mkrn2 |
| Pdcl | Lrrc59 | Tlr1 | Snord15b |
| Ifngr1 | Erg28 | Prp2 | Rap1a |
| Crlf1 | Sstr3 | Tmem44 | Fn3krp |
| Pcsk4 | Fbxw5 | Man2c1 | Zc3h12c |
| Rab3gap2 | Naa50 | Slc24a2 | Actr3 |
| Ier2 | Plcb4 | Rin2 | Il27 |
| Mfap5 | Sp3 | Csf2 | Hps6 |
| Pals1 | Cd63 | Ice2 | Olfr967 |
| Tor1b | Sct | Tgfb1i1 | Abhd10 |
| Efna1 | Mnx1 | Spata3 | Ckap2l |
| Twf1 | Prpf40a | Sult1a1 | Olfr1115 |
| Luc7l2 | Dnajb9 | Tomm22 | BC065397 |
| Atm | Ryk | Prss57 | E130114P18Rik |
| Tmem191c | Gnpda2 | Ube2g1 | Olfr214 |
| Pacsin3 | Tfg | Zfp689 | Tas2r143 |
| Srp72 | Mtap | Tspan8 | Smim26 |
| Wdr82 | Atp8a1 | Dok5 | Klk6 |
| Il25 | 2410004B18Rik | Olfr495 | Znrd2 |
| Slc25a11 | Pgm1 | Aqp11 | Ptprg |
| Tbc1d16 | Macrod2 | Elmod3 | Otud7a |
| Cdx1 | Rbks | Gpx8 | Gm16982 |
| Tmem30a | Ube4b | Isy1 | Clec4a2 |
| Fat3 | Ddx58 | Hif3a | Mex3a |
| Riox1 | Mrps7 | Spem1 | Wdr81 |
| Ppp2cb | Stt3a | Snu13 | Klhl5 |
| Nepro | Abcb9 | Lrrc55 | Efhc2 |
| Aig1 | Asb2 | Tars2 | Ct55 |
| Mfn1 | Usp4 | Slc38a8 | Gbp9 |
| Tff2 | B930095G15Rik | Dhx40 | Capn10 |
| Rabgef1 | Medag | Syt1 | Ccdc158 |
| Ttc9b | Srd5a3 | Olfr203 | Dync1li2 |
| Tiparp | Arid2 | Mfsd11 | Esam |
| Tspan31 | Dpp9 | Oaz2 | Psmc3ip |
| Fcgrt | Rbbp6 | Prune1 | Gcnt1 |
| Myof | Mdc1 | Hs6st3 | Cybrd1 |
| Lsm14a | Orai2 | Spata2 | Zswim7 |
| Hipk1 | Bbs4 | Polr1e | Slc8a3 |
| Shisa5 | Prm3 | Sptlc1 | Crisp4 |
| Plekhh1 | Scrt2 | Sgf29 | C8g |
| Tax1bp1 | Capn15 | Tmem108 | Washc3 |
| Naga | Gpbar1 | Bsph1 | Myg1 |
| Acss1 | Spata7 | Ap4s1 | Camk2n2 |
| C2cd4b | Rgs19 | A530088E08Rik | Tmem69 |
| Piezo1 | Adgra1 | Ccl24 | Olfr54 |
| Gne | Tapbpl | Tcea2 | Tmub1 |
| Ccng1 | Ankrd1 | Nop16 | Gabrb1 |
| Tomm70a | Sh3bp5l | Sorcs2 | Mrpl35 |
| Tbce | Bspry | Calcrl | Slc5a11 |
| Spty2d1 | Sox17 | Mcrip1 | 2410137M14Rik |
| Nop56 | Dbx2 | Gpr31b | Ndufaf1 |
| Rbm27 | Tbx2 | Araf | Gjc3 |
| Csnk1g3 | Tmem52 | Aqp4 | Pom121l2 |
| Urod | Kcnj4 | Cibar2 | Abca8b |
| H2-Ke6 | Pabpc1 | Ccn5 | Il1f10 |
| Chil3 | C3 | Mrpl14 | Lca5l |
| Gabra4 | Cd59a | Uncx | Mir124a-3 |
| Atg101 | Ptk2 | Ncf1 | Fam53a |
| Exosc9 | Plppr3 | Reps2 | 4930528A17Rik |
| Haus2 | Rock1 | Ep400 | Syap1 |
| P2rx4 | Pinx1 | Zfp385b | Ebi3 |
| Dgcr6 | Desi1 | Brip1os | Zfp850 |
| Dlgap1 | Tmem164 | Col14a1 | Tnn |
| Pitpnc1 | 1810010H24Rik | Rpl36 | Nphp3 |
| Ccl6 | Gm10578 | Snord15a | Hdgfl1 |
| Mdh2 | Axin1 | Gm11961 | 3110082J24Rik |
| Nrtn | Creb3 | Prdm8 | Myb |
| Urb2 | Rad23a | Gkn1 | Pllp |
| Atp6v0d1 | Prok1 | Tomm20l | Olfr481 |
| Mir148a | Ncoa1 | Scaper | Tmtc1 |
| Dact3 | Kmt5a | Tap1 | 1700016K19Rik |
| Ntn4 | Fbxo16 | Prkn | Tspan9 |
| Acer3 | Shroom2 | S100a8 | Kptn |
| Tmx3 | Parp1 | Mir9-3 | Amph |
| Stx12 | Clstn1 | Adamts17 | Olfr1193 |
| Epha2 | Tepp | Mir125b-1 | Psma6 |
| Mir25 | Taf5l | Sec24c | Fyttd1 |
| Oat | Cracr2a | Rgcc | Pcsk9 |
| Pwp2 | Serbp1 | Dhrs4 | Il2ra |
| 0610009L18Rik | B3gat1 | Hyls1 | Trap1a |
| Pex11a | Phyhd1 | Ager | Fshb |
| Sgpl1 | Selenbp2 | Bop1 | Tbca |
| Arrdc1 | Nrxn2 | Hrh2 | Tmprss7 |
| Mrps24 | Cdsn | 1810013D15Rik | Acmsd |
| Phf23 | Fam50a | Cfap54 | Irx3 |
| Car11 | Tamalin | Ada | Ppm1e |
| Mir673 | Rere | Cuzd1 | Lce3b |
| Dynlrb1 | Mycl | Oas3 | Malt1 |
| Rpp30 | Plin1 | 4930483J18Rik | Plekhg6 |
| Sar1b | Zfp935 | Arhgap39 | Mesp2 |
| Exoc1 | Orai3 | Pin1rt1 | Mybl2 |
| Snx16 | Nudt4 | Fxr1 | Lypd4 |
| Sugp1 | Zfp469 | Brox | Adprhl1 |
| Jak2 | Lpar6 | Atp5md | Fam53c |
| Rrm2 | Atg14 | Tspan15 | Washc5 |
| Srgap2 | Gm12250 | Rnf208 | Cep295 |
| Nfe2l1 | Lemd3 | Prkag2 | Rnf123 |
| Tmtc2 | Med7 | Isx | Prcc |
| Nckap5 | Prss46 | Kcnv1 | Gm17359 |
| Lrrc4b | Emc3 | Grip1 | Iba57 |
| Psme4 | Cenpm | Cx3cl1 | Mtif2 |
| Kitl | Zfp661 | Dbndd1 | Zfp772 |
| Uqcrb | Tmem126a | Tbck | Dhdh |
| Eif2ak2 | Ccdc59 | Serpinb7 | Gli2 |
| Nudt8 | Rev3l | Ftsj1 | Vmn1r84 |
| Lyplal1 | Hnrnpul1 | Nsmce1 | Myh7 |
| Nfya | Entpd5 | Nipbl | Olfr110 |
| Bok | Lpin3 | Olfr494 | Zfp551 |
| Trp53 | Rpl22 | Tdrp | Atrip |
| Abhd5 | A130010J15Rik | Npbwr1 | Ubqln1 |
| Sfpq | Prdm13 | Pdzk1ip1 | 1700012A03Rik |
| Naa35 | Mybpc3 | Snora69 | Spock1 |
| Slc7a7 | Ackr1 | Sbk1 | Mir10a |
| Usp37 | Slc25a44 | Zfp950 | Tubg1 |
| Pecr | Ciao2a | Ttyh2 | Dynap |
| Rogdi | Marchf8 | Zfp961 | Mfsd6 |
| Pgs1 | Nasp | Pate11 | Gpx5 |
| Smarce1 | Arid4b | Klrb1 | Scrt1 |
| Bccip | Atf6b | Dyrk1b | B9d2 |
| Arf4 | Chrdl2 | Myl12b | BC051076 |
| Nsun2 | Tent2 | Mixl1 | Tmc6 |
| Cdk18 | Pitrm1 | Rbm5 | Mindy1 |
| Idh3g | Bub3 | Ntan1 | Ift172 |
| Cdyl | Tmem70 | Slc25a19 | Htra2 |
| Traf4 | Poldip3 | Cnot6l | Cthrc1 |
| Fam241a | Clec4a1 | Med25 | Kcnc4 |
| Ankfy1 | Gpi1 | Vmn1r8 | Cnot3 |
| Ptpn3 | Zfp688 | Pkia | Plekhg5 |
| Neu2 | Lrrc56 | Atg13 | Nmral1 |
| Jund | Khdc3 | Med19 | Sdhaf4 |
| Mid2 | Naa30 | Nrm | Cggbp1 |
| Mkrn1 | Tlr4 | Tmem186 | Cenpu |
| Dnttip1 | Nacad | Scrib | Slc46a1 |
| Prpsap1 | Hpgd | Ptprn | Fbxw18 |
| Pon2 | Ndufs4 | Commd1 | Agbl2 |
| Cope | Alyref | Dipk2a | Purg |
| Fignl2 | Wnt7a | Zfp426 | C1qtnf7 |
| Tmem263 | Dbx1 | Dennd6a | Gna11 |
| Mmab | Rnpc3 | Pex16 | Nfkbiz |
| Cyb561 | Zc3h14 | Cpsf3 | Rubcnl |
| 5730408K05Rik | Ebf4 | Gga2 | Lias |
| Usp30 | Tceal8 | Ypel4 | Nat8l |
| Slc25a42 | Gsx2 | Glrx5 | Ftmt |
| Camk2d | Gpr137 | Mtarc1 | Xrcc4 |
| Cav2 | Cyb561a3 | Rpl26 | Akr1c21 |
| Uqcrc2 | Ctsh | Prm1 | Enpep |
| Slc9a9 | Nek6 | Pdzd7 | Cdk7 |
| Mafa | Smim45 | 1600014C10Rik | Zfp518a |
| Tatdn2 | Katna1 | Rfng | 9330133O14Rik |
| Setd3 | Gm9903 | Grid1 | Pax7 |
| Lrfn2 | Slc25a22 | Gsk3b | Zmym1 |
| Snrpe | Bend4 | Insl6 | Nfrkb |
| Inava | Pygm | Frs2 | Mir27a |
| Ezh1 | Herc1 | Dact2 | Trps1 |
| Ccr2 | BC049762 | Diras1 | Mrpl1 |
| Prkdc | Reg3d | F930015N05Rik | Sele |
| Acox1 | Runx3 | Tdpoz1 | Shfl |
| Mob1b | Znfx1 | Strip2 | Apof |
| Fgfr1 | Prmt3 | Slco6d1 | Zfp457 |
| Lyrm4 | Csf1 | Tmem198 | Tbc1d8 |
| Odr4 | Suz12 | Plekhd1os | Crip3 |
| Smg7 | Prkce | Rpn1 | Farsb |
| Fam114a1 | Tfb1m | Foxf2 | Zkscan14 |
| Rab11a | LTO1 | Crybb3 | Acp4 |
| Adgra3 | Elof1 | Mrgprb4 | Ly6g5c |
| Lgr4 | Tut4 | Ccl22 | Cypt12 |
| Sema3e | Zkscan17 | Erp29 | Spatc1l |
| Entpd2 | Rfx7 | Morn2 | Prlh |
| Spdef | Pole4 | Add3 | Vmn1r32 |
| Mob3b | Sgtb | Coq5 | Ercc6 |
| Mib1 | Map3k12 | Colgalt2 | Avpr1b |
| Wnk2 | Prtg | 4930515G01Rik | Cabp7 |
| Rrbp1 | Trrap | Nkpd1 | Lrig3 |
| Mier1 | Snx27 | Setd4 | Npas1 |
| Lpin1 | Gtf2f1 | Ppia | Rag1 |
| Magi3 | Tcf4 | Kif3b | 1700016D06Rik |
| 0610010K14Rik | Ube2q2 | Gm3213 | Ndufb3 |
| Foxp2 | Osbp | 6720489N17Rik | Ankfn1 |
| Peg10 | Pnma8b | Pole | Kcnk6 |
| Selp | Herpud2 | Megf11 | Thap6 |
| Aga | Nhlrc2 | Cby1 | Ccdc106 |
| Syngr1 | Tmie | Dynlrb2 | Iqsec2 |
| Usp25 | Htra4 | Ago2 | Wasf1 |
| Babam2 | Irgq | Ppip5k1 | Olfr173 |
| Mtmr1 | Slc35a1 | Cep162 | Mrgprh |
| Gmppa | Casp3 | Rgl1 | B230217C12Rik |
| Lmx1b | Rassf6 | Myo1f | Vps26b |
| Mrpl33 | Zfp639 | Clk1 | Rimbp2 |
| Snx10 | Pank3 | Tgm4 | Cd209b |
| Rims4 | Cxcl10 | Tdgf1 | BC037156 |
| Zfp598 | Tox2 | Trak1 | Dock10 |
| Samd9l | Nhp2 | Phf13 | Trabd |
| Parp14 | Pik3ip1 | Rtn4ip1 | Kcns1 |
| Nhlrc1 | Tmprss6 | E4f1 | a |
| Srgn | Asl | Bpifb2 | Thbs4 |
| Itgav | Dnaja4 | Vmn1r48 | Rad51c |
| Ptms | Ccny | Cnih2 | Tfap2d |
| Rusf1 | Vps33b | Klk1b27 | Abcf3 |
| Kat6b | Abca2 | Ttyh3 | Cyp2j9 |
| Adcy9 | Ndufs5 | A530032D15Rik | Olfr1148 |
| Rnf24 | Gm10000 | Ino80d | Slc12a3 |
| Ddo | Gm11564 | Oas2 | Hgsnat |
| Mir217 | Mirlet7i | Sox4 | Mpg |
| Mtmr4 | Ccl3 | Ormdl3 | Kl |
| Fam83b | Begain | Snapin | Efhc1 |
| Nup153 | Ncln | Psap | Wdr11 |
| Txndc16 | H2bc14 | Zfp707 | Klhl13 |
| Kcnk12 | Ankrd40 | Tpsb2 | Timm23 |
| Lad1 | Vps37c | Snta1 | Epha1 |
| Sh3pxd2b | Galnt6 | Peli2 | Rp1l1 |
| Pnpt1 | Xpc | Slc47a2 | Igkv6-14 |
| Cep43 | Zmym4 | Rn7sk | Vps35l |
| Pfkfb2 | Sephs1 | Lcp1 | Pdzph1 |
| Fzd4 | Tacc1 | Zfp456 | Snx2 |
| Sft2d1 | A430005L14Rik | Wnt11 | Notch4 |
| Pip4p2 | Atp2a2 | Slc16a8 | Stip1 |
| Sdccag8 | Tcaim | Olfr629 | Cptp |
| Cpsf4 | Zfp830 | Arhgap30 | 1520401A03Rik |
| Cabcoco1 | Mrnip | Stk33 | 1700009J07Rik |
| Paqr3 | Spag4 | Cd4 | Pelp1 |
| Gpbp1 | Dbi | Rpl7a | Ldlrad4 |
| Slc7a5 | Tnrc6c | Ccdc110 | Vps45 |
| Epop | Comtd1 | Sccpdh | Mtag2 |
| Ddx31 | Clps | Scd1 | Anks1b |
| Ifrd1 | Gmpr2 | Podnl1 | Peli3 |
| Sae1 | Cep76 | Hoxb5 | Cldn5 |
| Tmem151a | Osbp2 | Csmd2 | Nat1 |
| Smim3 | Eif4g1 | Ubtf | Sumf1 |
| Ints3 | Hoxb7 | Igfn1 | Lst1 |
| Ica1 | Mmp24 | Slc22a16 | Npb |
| Gls2 | Ambp | Glyctk | Hunk |
| Sptbn1 | Tgfbrap1 | Nanos2 | Rpl28 |
| Jpt2 | Uvssa | Pde4d | Armc7 |
| Efl1 | Spock2 | Ski | St6galnac3 |
| Tmem203 | Olfr516 | Ccdc66 | Rps6ka6 |
| Hes1 | Col16a1 | Slc6a17 | Zfp24 |
| Dynlt3 | Wars | Mmgt2 | Oscar |
| Mir20a | Baz1b | Dtx3l | Sec63 |
| Slc27a1 | Rbm15 | Opn1mw | Pebp1 |
| Psmd2 | Ghrhr | Tspyl1 | Mettl27 |
| Klhl9 | Rfx2 | Snap23 | Gm128 |
| Rgmb | Pycrl | Olfr686 | Ecd |
| Heatr5a | Tsc22d3 | Notch3 | Pfas |
| Blvrb | Foxe3 | Etaa1 | Rsph1 |
| Lpl | Th | Mir186 | Cyb5r2 |
| Nifk | Alg2 | Hbp1 | Chd3 |
| Trio | Vopp1 | Cyp21a1 | Atp1a3 |
| Nup188 | Zbtb42 | Epha5 | Frzb |
| Arpc3 | Snora23 | Tspan4 | Man1c1 |
| Lmf2 | Ulk2 | Rd3 | Tmem230 |
| Gstz1 | Pld1 | Cdhr2 | Sass6 |
| Rasa2 | D330050I16Rik | Arhgap6 | 2310011J03Rik |
| Amn | Crebrf | Pcdhb22 | Prox2 |
| Rlim | Zfp791 | Atg2b | Cryzl2 |
| Acot9 | Rhov | Cd244a | Jmy |
| Atp5g2 | Prickle1 | Trip4 | Slc19a3 |
| Naip2 | Ankrd13c | Cep350 | Sik1 |
| Rab11fip1 | Trappc13 | 4933439C10Rik | Cyp24a1 |
| Serpinf2 | Ajm1 | Elmo2 | Sh2d4a |
| Golph3l | Arhgap10 | Ly6g6f | C130036L24Rik |
| Tmem219 | Nmur1 | Slc4a4 | D630004N19Rik |
| Luzp1 | Hoxb1 | Faim2 | Shcbp1l |
| Fhdc1 | 4930412O13Rik | Usp17ld | Sult6b2 |
| Phf12 | Ccdc40 | Krt12 | Mir199a-1 |
| Mir92b | Txn2 | Actl9 | Tmem210 |
| Onecut1 | Mir361 | Obscn | Rhbdl2 |
| Ctps | Hes7 | Fam32a | Ncf4 |
| Hsf2 | Xkr8 | Wwc2 | Tpp1 |
| Yars | Cfap97 | Ibtk | Thpo |
| Smad1 | Kat8 | Zmym5 | 1700029H14Rik |
| Cers2 | Lrrc14b | Cog2 | Hook2 |
| Spats2 | Efna2 | Rtn3 | Lrrc46 |
| Trmt5 | Cachd1 | Rps9 | Magea7-ps |
| Sec61g | Slc35b2 | 1700113H08Rik | Tmem17 |
| Aste1 | Rorc | Mir138-2 | Tmem217 |
| Gadd45b | Ehmt2 | Rhox9 | Ccm2l |
| Ankrd50 | Mxra8 | Psmc3 | Cldn17 |
| Irf9 | Wnt10b | Olfr466 | Baz2b |
| Cyb5r1 | Spink1 | Arhgap42 | Gpr157 |
| Socs1 | Tnfaip8l3 | Ryr2 | Slc4a2 |
| Pus3 | Rnf166 | Fcsk | Tnks |
| Mettl16 | Lrrc7 | Olfr109 | Krtap19-1 |
| Ywhab | Rexo2 | Zdhhc11 | Olfr1410 |
| Taf1b | Ppfia3 | Hras | Pik3cg |
| Enah | Ap1s3 | Ttll11 | P3h1 |
| Aacs | Gpr25 | Ecel1 | Eif3m |
| Slc11a2 | Usp53 | Slc24a4 | Hsd3b2 |
| Ptgr2 | Akap10 | Polr3d | Olfr1282 |
| Soat2 | Vasp | 1700116B05Rik | Aar2 |
| Brix1 | Rab39 | Synrg | E330020D12Rik |
| Cpeb1 | Nt5c2 | Lifr | Npc1l1 |
| Med13 | Arid1b | Pacs2 | Sun3 |
| Slc35e4 | Fscn2 | Slc35f2 | Hmgb4 |
| Naxd | Gapdh | Arl13b | Fancd2 |
| Gm10638 | Zfp26 | Rhpn1 | Adtrp |
| Fbxo11 | n-R5s136 | Unkl | Dtwd1 |
| C2cd4a | Rps21 | Emilin1 | Tnfrsf19 |
| Mapk6 | Cpq | Acyp1 | Ddx41 |
| Smg8 | Col6a4 | 3425401B19Rik | Gm9961 |
| Acbd5 | Emilin3 | Crppa | Ptafr |
| Ift46 | Ebpl | Zfp12 | Arhgap31 |
| Fbl | Ilk | En1 | Gclm |
| Gm13889 | Oaf | Marchf9 | Nutm1 |
| Rbm28 | Ggn | Ptk7 | Tmem200c |
| Atf7ip | Zswim6 | Ndel1 | Neil3 |
| Slc39a5 | Mtfr1l | Atp10d | Nudt9 |
| Tmx1 | Glis1 | Cacna1a | Casq1 |
| Foxred2 | Igf2os | Sntg2 | 4930564D02Rik |
| Baiap2l2 | Slc35d1 | Onecut3 | Psmb8 |
| Slc20a1 | Zfp14 | Eif2s3y | Olfr736 |
| Mrps18b | Napa | Olfr1168 | Prkar1a |
| Emc4 | Ndufa5 | Nlrx1 | Maged2 |
| Ranbp1 | D16Ertd472e | Mme | Abcg8 |
| Fam110c | Slfn9 | Gnaq | Olfr530 |
| Cbx7 | Rbp1 | Alkbh5 | Dpysl2 |
| Vipr2 | Ddx28 | Ypel3 | Eme1 |
| Apobec1 | Pdgfc | Prss40 | Rpap2 |
| Cox15 | 1810013L24Rik | Wrn | Rabggtb |
| Wnt6 | Ino80b | Adcy6 | Olfr622 |
| Mapt | Zfp882 | Rab8a | Sgsm2 |
| BC003965 | Akr1c12 | Hddc2 | Cbr4 |
| Gm10100 | Syngr3 | Rasa4 | M1ap |
| Phldb1 | Ankrd22 | Fndc11 | Olfr920 |
| Ttll7 | Crocc | Olfr1309 | Spidr |
| Ch25h | 1700123O20Rik | 4930432M17Rik | Bag5 |
| Drd4 | Uba52 | P4hb | Gp9 |
| Slc22a17 | Ap4e1 | Trmt9b | Alppl2 |
| Myo16 | Strc | Hyi | Fgf6 |
| Maea | Zfp692 | Tab1 | Nmrk1 |
| Rrad | Fam25c | Micu1 | Kbtbd7 |
| Yif1a | Fgfr3 | Csl | Cdkn2a |
| Smtnl2 | Abracl | Fgf2 | Prdx6b |
| Nsmf | Npat | Mchr1 | F2rl2 |
| Dedd | Matk | Mdm1 | Plxnb3 |
| Slc2a13 | Mrpl46 | Oas1a | Chrna5 |
| Man2b1 | D130040H23Rik | Zfp943 | Ankrd53 |
| Bri3 | Lama5 | Flywch2 | Tor2a |
| Rhobtb1 | Ginm1 | AY512931 | Lcn9 |
| Gm6194 | E130309D02Rik | Gm53172 | Bcl2l13 |
| Neurl3 | Cbx3 | Polr2l | Olfr1233 |
| E130304I02Rik | Nadk2 | Mtln | Terb1 |
| Mia2 | H2-Q2 | Prss12 | Pou2af1 |
| Pdlim7 | Golga1 | Fgfrl1 | Pdzrn3 |
| Rassf1 | Mocs2 | Ptprr | Nt5dc3 |
| Ndufa11 | Sgta | 4930591A17Rik | Rnf38 |
| Morc3 | Ckb | Lactb2 | Vstm4 |
| Snapc4 | Eya3 | Olfr222 | Afap1l1 |
| Smox | Cd38 | Kcnmb4os1 | Acsbg2 |
| Cited1 | Cnot4 | Tm9sf4 | Trcg1 |
| Smc6 | Txndc15 | Gpr139 | Lrig1 |
| Ap1s2 | Mkrn2os | Gm9785 | Tfr2 |
| Sost | Bag3 | Soat1 | Tmem145 |
| Ppp1r15a | Cnot9 | Urgcp | Helb |
| Amt | Ttll12 | Mir26a-1 | Apba1 |
| Mrto4 | Lman2 | Eps15l1 | F7 |
| Sox3 | Klhl7 | Cyp4f18 | Zfand4 |
| Trim13 | Map2k3os | F10 | Mir132 |
| Ndufa10 | Cyp26b1 | Mboat7 | Dap3 |
| Gtf3c4 | Usf2 | Ankrd7 | Olfr421-ps1 |
| Ppp2r3a | Gm4827 | Prkaa2 | Il21 |
| Msh6 | Plcl1 | Mir196a-2 | Myo1g |
| Tlx2 | Lin37 | 4933407L21Rik | Calhm6 |
| Cbfb | Aco1 | Olfr362 | Gbp4 |
| Mavs | Ank3 | Snord47 | Fgfbp3 |
| Pcbd2 | Lyl1 | Neto2 | Ano9 |
| Hmgn1 | Tceal5 | Slc4a3 | Pim1 |
| Zfp106 | Atp6v1c1 | Kalrn | 4930544M13Rik |
| Mrpl30 | Aloxe3 | Pip5k1c | Drd2 |
| Mrfap1 | Reg3b | Sap30 | Cklf |
| Pan3 | Acvr2b | Crybg1 | 4833420G17Rik |
| Capza2 | Uba1 | Tmem255b | Klf4 |
| Uaca | 1300017J02Rik | Prpf18 | Zfp69 |
| Mir328 | Laptm4a | Vamp5 | BC043934 |
| Rhou | Pi15 | Mknk2 | Eif3f |
| Inpp5a | Gm5155 | Ube2l3 | Fndc5 |
| BC028777 | Ehmt1 | Zmym6 | Armt1 |
| Dgcr8 | Xdh | Atl3 | Ttc21b |
| Itfg1 | Paqr6 | Ugt2b38 | Mir488 |
| Atp13a2 | Grtp1 | Slc28a1 | Lrp8 |
| Mtarc2 | Ascl5 | Gatad2a | Rep15 |
| Prrt3 | Pde2a | Diras2 | Pglyrp4 |
| Sh3d19 | Lrrc51 | Mir484 | Limk1 |
| Tmem205 | Pla1a | Chrna3 | Brsk2 |
| Adar | Eif3h | Atp10b | Steap1 |
| Map4k3 | Ccdc120 | E230001N04Rik | Fhip2a |
| Nectin2 | Tsg101 | Tmem68 | Nfe2 |
| Etv6 | Apex1 | Chmp1a | Cers3 |
| Tnip1 | Tnfaip2 | Gpr137c | Mrgbp |
| Arf2 | Enthd1 | Adgrl2 | Ap1s1 |
| Snora75 | Nap1l1 | Cul4b | Ankrd37 |
| Cd164 | Rab40b | Rps29 | Sp8 |
| Metrn | Ftcd | Rfxank | Serpinb9d |
| Smim27 | Ldlrad1 | Faim | Tat |
| Dcaf6 | Map3k20 | Igfbp7 | Mir335 |
| Borcs5 | Cort | Sh2d6 | Grhl2 |
| Foxi2 | 0610040J01Rik | Nlrp9b | Gtpbp1 |
| Retreg3 | Serpinb5 | Ints4 | Sspo |
| Lsm4 | Snrk | Ppp4r2 | Pdzrn4 |
| Septin2 | Lrrn2 | Olfr1321 | Mutyh |
| Fbn1 | Tmem131 | Il1bos | Hemk1 |
| Micall1 | Tmprss13 | Abcf1 | Mir143 |
| Trp53bp2 | Gphn | Tmc7 | Rbbp4 |
| H2-K1 | Fzd1 | Anapc10 | Hap1 |
| Ythdc2 | Tbrg3 | Nol6 | Gm14661 |
| Eif3a | Adgre1 | Fat4 | Gpr45 |
| Slc16a12 | Gnb5 | Greb1l | Hebp1 |
| Fem1b | Crlf2 | Fam221a | Vmn1r180 |
| Plrg1 | Mcoln1 | Fthl17f | Cd48 |
| Scml4 | Gm6756 | Sema5b | Nkd2 |
| Tent5b | Urad | Zfp619 | Znrf3 |
| Mir346 | Ubxn2a | Tmprss2 | Micu2 |
| Dnajc11 | Gm15441 | Grm4 | Cbfa2t3 |
| Senp1 | Fgf16 | Nphp4 | Ripk2 |
| S100a1 | Chchd10 | D5Ertd579e | Gykl1 |
| Slc16a1 | Bmp6 | Fbxo21 | Slitrk3 |
| Sox1 | Nrros | Pde6b | Rbpms2 |
| Ttl | Uap1 | Med20 | Smpd1 |
| Sec13 | Mapk1ip1 | Tpd52l1 | 4921513I03Rik |
| Rfc5 | Mfsd8 | Olfr193 | Arhgap22 |
| Bcor | Capns2 | 2510039O18Rik | 9030612E09Rik |
| Tasp1 | Rrp1 | Mtres1 | Skint10 |
| Nkrf | Nrip1 | Ephb3 | Cytl1 |
| Nagpa | Creg2 | Sipa1l3 | Mlana |
| Snx4 | Dhx34 | Dhrs7b | Lrrc9 |
| Ntpcr | E130201H02Rik | Rabep2 | Nat8f4 |
| Zgrf1 | Dpy19l1 | Ilkap | Slitrk5 |
| Tnfrsf22 | Mir19b-2 | Gm6642 | 2810004N23Rik |
| Sf3a3 | Cyp2s1 | Ctnnb1 | Rnf227 |
| Mphosph10 | Dtna | Fam78a | Ankrd9 |
| Ccser1 | Klf2 | Nr4a2 | Clip3 |
| Itgb6 | Grip2 | Use1 | Defb29 |
| Emb | Irf2bpl | Abhd14a | Olfr77 |
| Abcg1 | Tmem132b | Prex1 | Vmn1r36 |
| Sec31a | Ube3c | Lbr | Rbck1 |
| Zc3h4 | Slc35g1 | Dao | Serpinb13 |
| Tnfaip1 | 6430503K07Rik | Rabl3 | Mc3r |
| Hes5 | Gm266 | P3h2 | Dgke |
| Usp6nl | Larp7 | Hoxa11 | Ccne2 |
| Vps26a | Sfrp2 | Fth1 | Tenm4 |
| Lrg1 | AI837181 | Rab7b | Pappa2 |
| Nr1d2 | Dus2 | Olfr1461 | Kctd1 |
| Yif1b | Pals2 | Cenpj | Rab39b |
| Lratd1 | Cdhr3 | Prkag1 | Pnn |
| Rnf187 | Plod2 | Trip11 | Ppp1r8 |
| Actl6a | BC005537 | Cibar1 | Adcy5 |
| Kcnj11 | Exoc3 | Caap1 | Mpped2 |
| Plekhb1 | Grb14 | Mrgpra6 | Synj1 |
| Crcp | Kcnj2 | Lrrc74a | 1700109H08Rik |
| Lrrc42 | Phox2a | Rpph1 | S1pr1 |
| Rpp25l | Washc4 | Ccdc81 | A130051J06Rik |
| Taf9b | Slc45a3 | Prr16 | Pax4 |
| Ndufv3 | Sox18 | Ifi44 | Kcnk16 |
| Rbm15b | Papln | Itprid2 | Tas2r121 |
| Fam20b | Gpr108 | Rgp1 | Urm1 |
| Tpi1 | Gstp1 | Coa6 | Tysnd1 |
| Rbfox2 | Aff4 | Bud13 | Arpc5l |
| Tyro3 | Klk1b8 | Mir500 | Exoc7 |
| Eme2 | Pnpla1 | Ermp1 | Agap3 |
| Esd | Srr | Clmp | Adam1a |
| Sirt1 | Il15ra | Ap1ar | Kbtbd13 |
| Celsr2 | Gopc | Gpr35 | Cd40lg |
| Deptor | Sars | Tmem38b | Mir29b-1 |
| Patj | Tmem258 | Becn1 | Necap1 |
| Septin11 | 1190007I07Rik | Zfp87 | Idua |
| Cyb5r4 | Pnpo | Mtrf1 | Sf3a2 |
| Neurl1b | Sparc | Tanc2 | Rnf32 |
| Dnajc5 | Alox5ap | Zfp169 | Tecpr1 |
| Selenot | Adora1 | Trim39 | Tlr8 |
| Fech | Vmn2r66 | Sned1 | Slc36a3 |
| Errfi1 | Lefty1 | Rars2 | Prelid2 |
| Gstp3 | Ptgs2 | Olfr171 | Tut7 |
| Ap2m1 | Pkd1 | Plxnc1 | Gcnt7 |
| Mir17hg | Nxph4 | Pla2g1b | Dmrt1 |
| Ccdc50 | Hexa | Cep41 | Gucy1b2 |
| Atic | Clec4e | Dmrt2 | Tpx2 |
| Pltp | Hsd3b7 | Prl | Pax5 |
| Spaca6 | Chm | Rps19 | Prkrip1 |
| Fah | Kirrel2 | Megf10 | Sem1 |
| Ndufa9 | Dcaf4 | Tm4sf5 | Fam76a |
| 2610528J11Rik | Bcl6 | Pax9 | Atp8b4 |
| Csnk1g1 | Cops5 | Utf1 | Trim9 |
| Vdac2 | Nfx1 | Megf9 | Cfap157 |
| Mettl3 | C030017K20Rik | Uqcc1 | Acap3 |
| Ulk1 | Samhd1 | Sohlh2 | Serpina11 |
| Pkmyt1 | 9430060I03Rik | Frat2 | Ppp2r5c |
| Bmp2k | Msantd4 | Cubn | Olfr319 |
| Zfas1 | Maff | Fam170a | Stap1 |
| Mapre2 | Snx5 | Fmo3 | Krt75 |
| Atpif1 | Erlin1 | Cdh15 | A4galt |
| Ptx3 | Cfb | Cd70 | Bnip3l |
| Ttpa | Galnt2 | Gabrb2 | Stmn3 |
| Hcfc1 | Dpcd | Ppp6c | Mab21l1 |
| Btbd17 | Duoxa1 | Card19 | Rcor2 |
| BC001981 | Med17 | Insm2 | Atxn7 |
| Cln8 | AY036118 | Pip4k2a | Lce3f |
| Prrc1 | Hapln2 | Ntsr2 | Tafa4 |
| Psma5 | Tbc1d22b | Coq2 | Myc |
| Lzic | Hoxd12 | Smarcd3 | Olfr525 |
| Gsr | Mid1 | Tmem185a | Slc41a1 |
| Pgd | Dnmt3b | Adarb2 | Taf5 |
| Uqcrh | Dusp23 | Olfr552 | Mov10 |
| Arrdc2 | Zfp691 | Hfe | Vmn2r10 |
| Gabarap | Bloc1s1 | Carnmt1 | Prss56 |
| 2310068J16Rik | Bicdl1 | Mael | Mir302c |
| Tlr3 | N4bp1 | Nfatc2ip | Nhlh1 |
| Bdh2 | Med12 | Inpp1 | Akr1c14 |
| Cycs | Septin10 | Cir1 | Acad12 |
| Zfp36l1 | Hsp90b1 | Wdr66 | Aanat |
| Ankrd52 | Slfn1 | Kifbp | Olfr640 |
| Larp4b | Chst10 | Spag7 | Qrsl1 |
| Grifin | Med28 | Spg20 | Olfr339 |
| Cyp46a1 | Ngly1 | Camta1 | Vmn1r22 |
| Ubl3 | Zscan21 | Stk11ip | Itgal |
| A230072E10Rik | Ddx47 | 1700102P08Rik | Ndufaf4 |
| Gjb1 | Ppp6r3 | Olfr239 | Csdc2 |
| Slc9a8 | Mmgt1 | Mn1 | Mettl21a |
| Syde1 | Timm9 | Aspscr1 | Six3os1 |
| Kcnh3 | Yipf3 | Atp4b | Zfhx3 |
| Aplp1 | Ube2a | Rasgrp3 | Gm1123 |
| Dazap2 | Cd2bp2 | Pip5kl1 | Glul |
| Smad6 | Bend7 | Rps10 | Pappa |
| Elac1 | Acot2 | Pwwp3b | Mb21d2 |
| Lnx2 | Sox8 | Gpld1 | Cyp2b13 |
| Galc | Otop1 | Slc29a1 | Slc22a21 |
| Tma16 | 1700054O19Rik | Drosha | Got2 |
| Galt | Ints5 | Stmn4 | Unc13c |
| Irx2 | Asns | Olfr963 | Arhgef18 |
| Atf5 | Cdk2ap2 | Cox18 | Crim1 |
| Hivep2 | Rflnb | Zfp365 | Stra6 |
| Fastkd2 | Lage3 | Tmem35a | Clptm1l |
| Syngr2 | Cd1d2 | Rph3a | Zfp119a |
| Igfals | Cd40 | B3galt5 | Hoxc12 |
| Klhl2 | Alg1 | Gabarapl1 | E230025N22Rik |
| Gabpa | Prr29 | Psmb5 | Adprs |
| Siva1 | Rmrp | Hsd17b11 | Rfc1 |
| Tdh | Lce1k | Cbarp | Pcare |
| Stradb | Slc43a2 | Slc7a9 | Ptpa |
| Sirt2 | Olfr632 | Il36g | Grm1 |
| Reep4 | Mlh1 | Map3k14 | Ikbke |
| Cabp2 | Enpp1 | Klhl35 | Sh3rf3 |
| Patl1 | Mapk14 | Msx3 | Socs2 |
| Npm1 | Scly | Cd300c | Phyhip |
| Ptger4 | Traf7 | Exd2 | Zfp507 |
| Ltbp4 | Lrrc49 | Pradc1 | Tmem59l |
| Mpp7 | Kctd5 | 4930571K23Rik | Sema6d |
| Atxn7l3 | Pabpc5 | Gm5134 | Trim59 |
| Igf2bp2 | Wnk1 | Chd8 | Tnik |
| Cyp20a1 | Dcn | A530016L24Rik | Fcer1a |
| Vps8 | Pf4 | Lzts1 | Dlx1 |
| 2300009A05Rik | Hic1 | Mycbp2 | Rhd |
| Nkx2-4 | Taf7 | Kif21b | Aqp1 |
| Prdx3 | Zfp2 | Epdr1 | Smg6 |
| Gsc2 | Haus8 | Olfr393 | Npdc1 |
| Mbnl3 | Vta1 | Gng11 | Olfr60 |
| Pqbp1 | Tal1 | Tekt3 | Sbsn |
| Rnaseh2c | Prpf31 | Kcnb2 | Snrpb |
| Abhd16a | Cox7a2l | Mmel1 | Tecta |
| Rdh13 | Lamp1 | Bgn | Wfdc21 |
| Loxl1 | Prmt7 | Slc29a3 | Cd34 |
| Acadl | Mir138-1 | Atp1b2 | Tnp2 |
| Fam168b | Cytip | Slc29a4 | Mdga1 |
| Alms1 | Hells | Tmem109 | H2-M3 |
| Fam98c | Cep63 | Mtcl1 | Mrps18a |
| Vav2 | Gm13884 | Armc12 | Frem3 |
| Ercc3 | 9530080O11Rik | Erich2 | Mir136 |
| Zrsr2 | Adamts18 | Gask1a | Slc12a5 |
| Rin1 | Trim65 | Sectm1a | Xkrx |
| Fkbp4 | Pecam1 | Azin2 | Bcl2l15 |
| Tlx3 | Nol7 | Olfr1160 | Wrap73 |
| Ppp3cb | Zscan22 | Mir142 | Opn1sw |
| Igsf5 | Fbxo28 | Gkap1 | Elmo1 |
| Lmbr1l | Snx3 | Trak2 | Kbtbd4 |
| Ccnh | 1110017D15Rik | Olfr870 | Bcl7c |
| Evx2 | Abhd12 | Mir350 | Pcnx4 |
| Rffl | Parg | Mir501 | Slc26a11 |
| Mir210 | Zfp593 | Anxa13 | Mycs |
| Trim37 | Cmbl | Wee1 | Tpcn2 |
| Pid1 | Thap11 | Iqub | Frmd8os |
| Wwp1 | Nit2 | Pld4 | Fbxl18 |
| Plxna1 | Lmod2 | Krr1 | Arx |
| Fkbp9 | Kif4-ps | Nxf2 | Olfr463 |
| Wdr26 | Mir674 | Aff3 | Rxfp4 |
| Ush1g | Scp2 | Maz | Iqcf5 |
| Usp33 | Sirpa | Scfd2 | Tnni2 |
| Sec24b | Abca9 | Layn | BC002059 |
| Pard6b | Mir141 | Ncapg2 | Mir3068 |
| Sdhaf1 | Atp8b3 | Gm829 | Gm10267 |
| Lin7b | Acacb | Best3 | Eif2ak3 |
| Ihh | Amacr | Tex16 | Lim2 |
| Slc25a12 | 1700016H13Rik | Zfp445 | Defb28 |
| Myo1d | Lamb3 | Ercc8 | Lrrc52 |
| Hcfc2 | Rxrb | Tas2r138 | Rasl11a |
| Stoml2 | Arfip2 | 0610038B21Rik | Ubap2l |
| Gjb2 | Gpatch2l | Fam98b | Rps3a1 |
| Cmtm8 | Cyp4f13 | Nkx6-1 | L1td1 |
| Ndufc2 | Krtap19-4 | Gdpd5 | Rps20 |
| Uri1 | Mrpl42 | Vps13a | Gm31758 |
| Tnpo2 | Snord49b | Olfr1331 | Ankrd55 |
| Bnip2 | Tmem121b | Gpr171 | Phc1 |
| Fam171a1 | Apol7d | Got1l1 | Izumo2 |
| Myo5c | Fbxo32 | Camk2b | Tlr2 |
| Aida | Sash1 | Scart1 | Acp2 |
| Tmtc4 | C230012O17Rik | Trhr2 | Gm39701 |
| Ipo7 | Ppp1r3c | 1700001C19Rik | Erv3 |
| Rhno1 | Endog | Swsap1 | Glt8d2 |
| Pop4 | Pirb | Pex6 | Rgs21 |
| Ramp1 | Lonrf2 | Misp | Bcar3 |
| Vps28 | Rspo1 | Il16 | Ttc23l |
| Fzd8 | Cenpc1 | Olfr1099 | Natd1 |
| St6galnac2 | Slc6a20b | Aurkb | Astn2 |
| Dhrs9 | Gabra1 | Ripply2 | Srp68 |
| Hs2st1 | Vgll3 | Krtap16-3 | Olfr1126 |
| Pik3cb | Rai14 | Tagln3 | Olfr1336 |
| Dennd10 | Paip2b | St7 | Slc35d3 |
| Fgf23 | Pax1 | Otop2 | AW112010 |
| Fto | Casp8ap2 | Ppy | Rpa1 |
| Khnyn |  |  |  |

**Materials and Methods**

**Real Time Quantify- Polymerase Chain Reaction (RT-qPCR)**

Total RNA was extracted from pancreatic tissue. 1 μg of total RNA was reverse transcribed to cDNA using HiScript III All-in-one RT SuperMix Perfect for qPCR (Vazyme, R333). RT-qPCR was performed using ChamQ Universal SYBR qPCR Master Mix (Vazyme, Q711-03). The specific primers for rat CXCL12 and β-Actin were indicated as follows: CXCL12, 5’ACAAAGCCTTAAACAAGAGGCT3’ and 5’GGCCCTTCCCTAACACTGAC3’; β-Actin, 5’AACCTTCTTGCAGCTCCTCC3’ and 5’AACCTTCTTGCAGCTCCTCC3’. Primers were synthesized by BioTNT (Shanghai, China).

**Determination of** **ALT, AST, UREA, CREA, CK-MB and LDH1**

ALT, AST, UREA, CREA, CK-MB and LDH1 levels in the plasma of rats were measured using commercial kits (Changchun Huili, Changchun, China) according to the manufacturers’ instructions.

**Supplementary Figures**


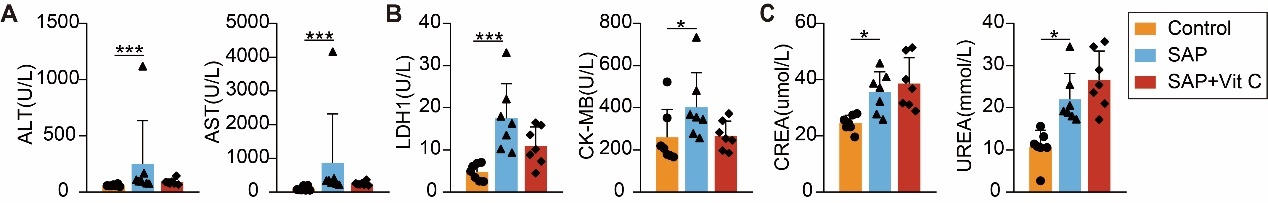


**Figure S1.** High-dose Vit C ameliorates liver injury and cardiac injury. (A, B) High-dose Vit C reduced the concentration of ALT, AST, LDH1 and CK-MB in the plasma of rats. (C) High-dose Vit C had no effect on the level of CREA and UREA in the plasma of rats. **P* < 0.05, ****P* < 0.001. P values were analyzed by non-parametric test.


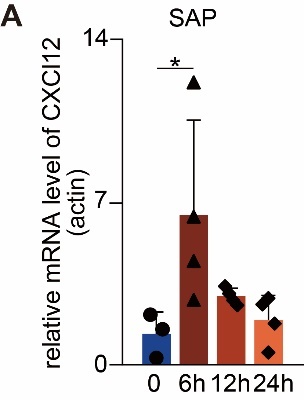


**Figure S2.** The transcriptional level of CXCL12 in pancreatic tissue (A) The relative mRNA level of CXCL12 in pancreatic tissue 0h, 6h, 12h, and 24h after the establishment of SAP in rats. **P* < 0.05. P values were analyzed by non-parametric test.


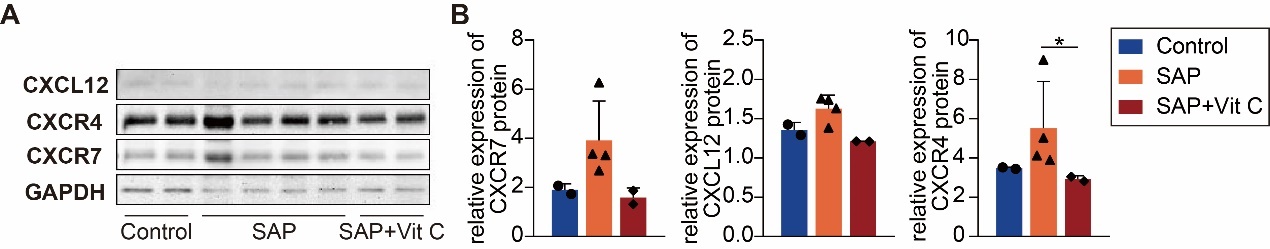


**Figure S3.** High-dose Vit C reduced the expression of CXCL12, CXCR4 and CXCR7 on platelets in SAP patients. (A, B) Western blot analysis of CXCL12, CXCR4, and CXCR7 in platelets from SAP patients before and after the treatment of high-dose intravenous Vit C (8g/d) for 3 days. **P* < 0.05. P values were analyzed by non-parametric test.


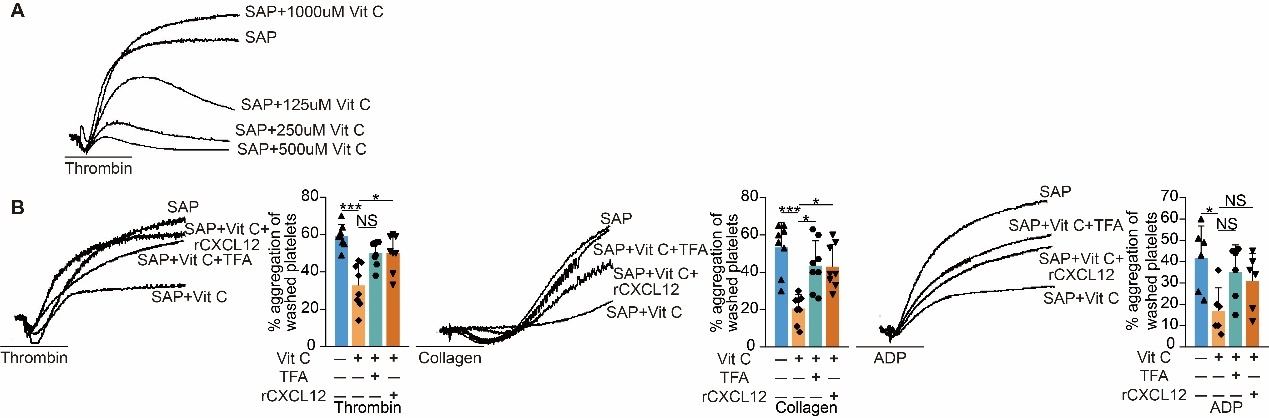


**Figure S4.** Vit C reduced platelets activity via CXCL12/CXCR4 pathway *in vitro*. (A) Platelet aggregation rate stimulated with thrombin (0.25U/mL) for 5 min from SAP rat. Washed platelets were preincubated with 125μM Vit C, 250μM Vit C, 500μM Vit C, 1000μM Vit C, and vehicle (0.9% NaCl), for 1h. (B) Platelet aggregation rate stimulated with collagen (8μg/mL), ADP (80μM), and thrombin (0.25U/mL) for 5 min from SAP rat. Washed platelets were preincubated with 250μM Vit C, 250μM Vit C+300nM TFA, 250μM Vit C+100ng/mL rCXCL12, and vehicle (0.9% NaCl) for 1h. **P* < 0.05, ****P* < 0.001. P values were analyzed by non-parametric test.
